# 1      **Astrocytic Regulation of Basal Ganglia Dopamine/D2-Dependent Behaviors**

2

3      Rosa Mastrogiacomo<sup>1#</sup>, Gabriella Trigilio<sup>1,2#</sup>, Daniel Dautan<sup>1,3</sup>, Céline Devroye<sup>1</sup>, Valentina Ferretti<sup>1</sup>,  
4      Enrica Vitali<sup>1</sup>, Genny Orso<sup>4</sup>, Roberto Marotta<sup>1</sup>, Federica Maltese<sup>1</sup>, Gessica Piras<sup>5</sup>, Alessia Forgiarini<sup>4</sup>,  
5      Giada Pacinelli<sup>1</sup>, Debora A. Rothmond<sup>6</sup>, John L. Waddington<sup>7</sup>, Filippo Drago<sup>2</sup>, Maria Antonietta De  
6      Luca<sup>5</sup>, Gian Marco Leggio<sup>2</sup>, Cynthia S. Weickert<sup>6</sup>, Francesca Managò<sup>1†</sup>, Francesco Papaleo<sup>1,3†\*</sup>.

7

8      <sup>1</sup>*Genetics of Cognition laboratory, Neuroscience area, Istituto Italiano di Tecnologia, via Morego, 30, 16163*  
9      *Genova, Italy.*

10     <sup>2</sup>*Department of Biomedical and Biotechnological Sciences, University of Catania, Catania, Italy.*

11     <sup>3</sup>*Fondazione IRCCS Ca' Granda Ospedale Maggiore Policlinico, Milano, Italy.*

12     <sup>4</sup>*Department of Pharmaceutical and Pharmacological Sciences, University of Padova, Padova, Italy.*

13     <sup>5</sup>*Department of Biomedical Sciences, University of Cagliari, Cagliari, Italy.*

14     <sup>6</sup>*Schizophrenia Research Laboratory, Neuroscience Research Australia, Sydney, Australia.*

15     <sup>7</sup>*School of Pharmacy and Biomolecular Sciences, Royal College of Surgeons in Ireland, Dublin 2, Ireland.*

16

17     #equal contribution

18     †co-senior authors

19     \*Correspondence: [francesco.papaleo@iit.it](mailto:francesco.papaleo@iit.it)

20

21 **Abstract**

22 Astrocytic involvement in dopamine dynamics related to motivational and sensorimotor gating abil-  
23 ities is unknown. We found that dysbindin-1 (Dys1) hypofunction increases the activity of astrocytes,  
24 which express only the isoform Dys1A that is reduced in the caudate of patients with schizophrenia.  
25 Astrocytic Dys1A disruption resulted in avolition and sensorimotor gating deficits, increased astro-  
26 cytic dopamine D2 receptors and decreased dopaminergic tone within basal ganglia. Notably, astro-  
27 cytic Dys1A hypofunction disrupted dopamine dynamics linked to reward expectancy and intercon-  
28 nected with astrocytes  $Ca^{2+}$  responses mainly in the globus pallidus externus (GPe). Finally, we  
29 proved these phenotypes were mediated by D2 receptors in astrocytes as their selective deletion in  
30 astrocytes either in GPe or SNc/VTA enhanced motivation and sensorimotor gating abilities as well  
31 as dopaminergic release in the GPe. Therefore, astrocytes control motivational and sensorimotor gat-  
32 ing processes through Dys1A/D2-dependent mechanisms within the basal ganglia.

33

34

35

36 **Keywords**

37 Astrocytes; dopamine; dysbindin-1A; D2 receptor; schizophrenia; globus pallidus external segment;  
38 motivation; sensorimotor gating; substantia nigra pars compacta.

39

## 40 **Introduction**

41 Astrocytes fundamentally contribute to brain homeostasis and play a role in brain physiology  
42 through reciprocal communication with neuronal cells<sup>1-6</sup>. Neurotransmitters can modulate astrocytic  
43 activity and, *vice versa*, astrocytic gliotransmitters can regulate neurotransmission<sup>2, 4, 5, 7, 8</sup>. Astrocytic-  
44 neuronal communication has been consistently reported to involve glutamatergic, cannabinoid,  
45 ATP/adenosine, cholinergic, and GABAergic systems<sup>2</sup>. Notably, an active role for astrocytes in do-  
46 pamine signaling has emerged<sup>3, 5, 9, 10</sup>.

47 The astrocyte-dopamine link appears to rely on distinct molecular factors in prefrontal cortex  
48 (PFC), nucleus accumbens (NAcc), globus pallidus external segment (GPe), substantia nigra (SN),  
49 and hippocampus<sup>3, 5, 9-11</sup>. This presupposes heterogeneous astrocytic modulation of dopaminergic  
50 signaling with area-specific functions<sup>12-14</sup>. However, the machinery underlying astrocytic control of  
51 dopaminergic signaling has not been fully explored. Moreover, the *in vivo* link between astrocytic  
52 activity, dopamine dynamics, and specific behavioral functions remain unknown.

53 Here, we report the unexpected discovery that the dysbindin-1A (Dys1A) spliced transcript of the  
54 Dystrobrevin Binding Protein 1 (DTNBP1) gene is uniquely implicated in the astrocytic regulation  
55 of basal ganglia dopamine/D2 signaling and related behavioral processes. Dys1 exists in at least three  
56 spliced transcripts, Dys1A, 1B, and 1C<sup>15</sup>, with 1A and 1C being orthologues in humans and mice<sup>15-  
57 17</sup>. These isoforms are believed to have distinct functions as they are differentially distributed in brain  
58 synaptosomes, are present in different functional domains, and have distinct binding partners<sup>17-19</sup>.  
59 However, the specific contribution of each Dys1 isoform in physiological functions, especially astro-  
60 cyte activity and related behavioral outcomes was yet unexplored.

61 We show that clinically-relevant Dys1 genetic variations alter astrocyte activity. Specifically, we  
62 find that Dys1A is the only isoform expressed in astrocytes and is preferentially involved in astro-  
63 cytic, but not neuronal, intracellular trafficking. Notably, selective disruption of Dys1A, induces be-  
64 havioral and dopaminergic alterations related to basal ganglia. This might be clinically relevant as we

65 found that Dys1A is decreased in the caudate of patients with schizophrenia. Finally, using a combi-  
66 nation of *in vivo* genetics, Ca<sup>2+</sup>, and dopamine sensor tools, we demonstrate that selective disruption  
67 of Dys1A in astrocytes is sufficient to generate distinct motivational, sensorimotor gating, and basal  
68 ganglia dopaminergic alterations related to astrocytic D2 receptor mechanisms within the SNc/VTA  
69 to GPe circuit. Overall, we show a hitherto unknown mechanism of astrocyte-dopamine interaction  
70 in the basal ganglia mediating motivational and sensorimotor gating abilities relevant to schizophre-  
71 nia and other illnesses that impact motivation and behavioral responses to salient stimuli.

72

## 73 **Results**

### 74 **Dys1 hypofunction alters astrocytic activity**

75 Dys1 has been linked to neuronal dopaminergic and glutamatergic signaling<sup>17, 20-24</sup>. However, *Drosophila* dysbindin (dDys) has shown dichotomic regulation of glutamatergic and dopaminergic trans-  
76 mission, with the latter involving glial cells<sup>25</sup>. To investigate if Dys1 regulates astrocytic activity in  
77 mammals, we used Dys1 heterozygous mice (Dys1<sup>+/-</sup>), a model with direct translational validity for  
78 both healthy human subjects and patients with schizophrenia<sup>20, 26</sup>.

80 Unbiased microarray analysis showed increased expression of reactive astrogliosis-related genes  
81 in Dys1 knockout mice compared to wild-type Dys1<sup>+/+</sup> (Fig. 1a and Supplementary Fig. S1). This  
82 was confirmed by higher immunoreactivity of the astroglial marker glial fibrillary acid protein  
83 (GFAP) in Dys1<sup>+/-</sup> compared to Dys1<sup>+/+</sup> littermates (Fig. 1b), which was similarly evident in PFC,  
84 NAcc, dorsal striatum (STR), and GPe (Fig. 1c).

85 Dys1 plays a crucial role in intracellular vesicular trafficking (Marley & von Zastrow 2010; Ji et  
86 al. 2009; Ito et al. 2010; Iizuka et al. 2007). Accordingly, electron microscopy analyses of intracellular  
87 vesicles revealed irregularly shaped and swollen cisternae of the Golgi complex with enlarged vesi-  
88 cle-like structures in both neuronal and astrocytic cells of Dys1<sup>+/-</sup> mice (Fig. 1d and Supplementary  
89 Video V1). Equivalent results in altered Golgi complex morphology were obtained by knocking down  
90 *Drosophila* dDys either ubiquitously (Fig. 1e) or in glial cells (Supplementary Fig. S1). dDys down-  
91 regulation did not affect the number of glial cells (Fig. 1f). This suggests that Dys1 can alter intracel-  
92 lular trafficking from and to Golgi in astrocytes.

93 Overall, these data provide initial evidence that reduced levels of Dys1 alter astrocytic functioning.

94

### 95 **Distinct neuronal/astrocytes expression and developmental patterns of Dys1 isoforms**

96 We then asked whether Dys1 isoforms might be differentially expressed in neurons and astrocytes.

97 Dys1A was expressed in adult mouse brain, in cultured astrocyte-enriched glial cells, and in cul-  
98 tured neuronal cells (Fig. 1g). In contrast, Dys1C was missing in astrocyte-enriched glial cells, while

99 its expression was higher than Dys1A in the brain as well as in cultured neuronal cells (Fig. 1g).  
100 Dys1A showed a stable expression over time in glial and neuronal cultures, while Dys1C was always  
101 absent in astrocytes cultures and increased its expression over time in neuronal cells (Fig. 1h,i). We  
102 confirmed divergent developmental patterns of expression of these two Dys1 isoforms, with similar  
103 findings in human and mouse brains. In particular, samples of human dorsolateral PFC revealed  
104 higher Dys1A expression in the embryonic phase, which gradually decreased across development  
105 (Supplementary Fig. 1). Conversely, Dys1C expression was lower in embryonic and childhood stages  
106 and then increased from adolescence (Supplementary Fig. 1). Similarly, in mouse PFC the expression  
107 of Dys1A protein decreased from the embryonic phase, while Dys1C increased its expression in ad-  
108 olescence (Supplementary Fig. 1).

109 Overall, these data show a similar developmental pattern of Dys1 isoforms expression between  
110 mice and humans, and define a previously unexpected constraint of Dys1A expression in astrocytes.

111

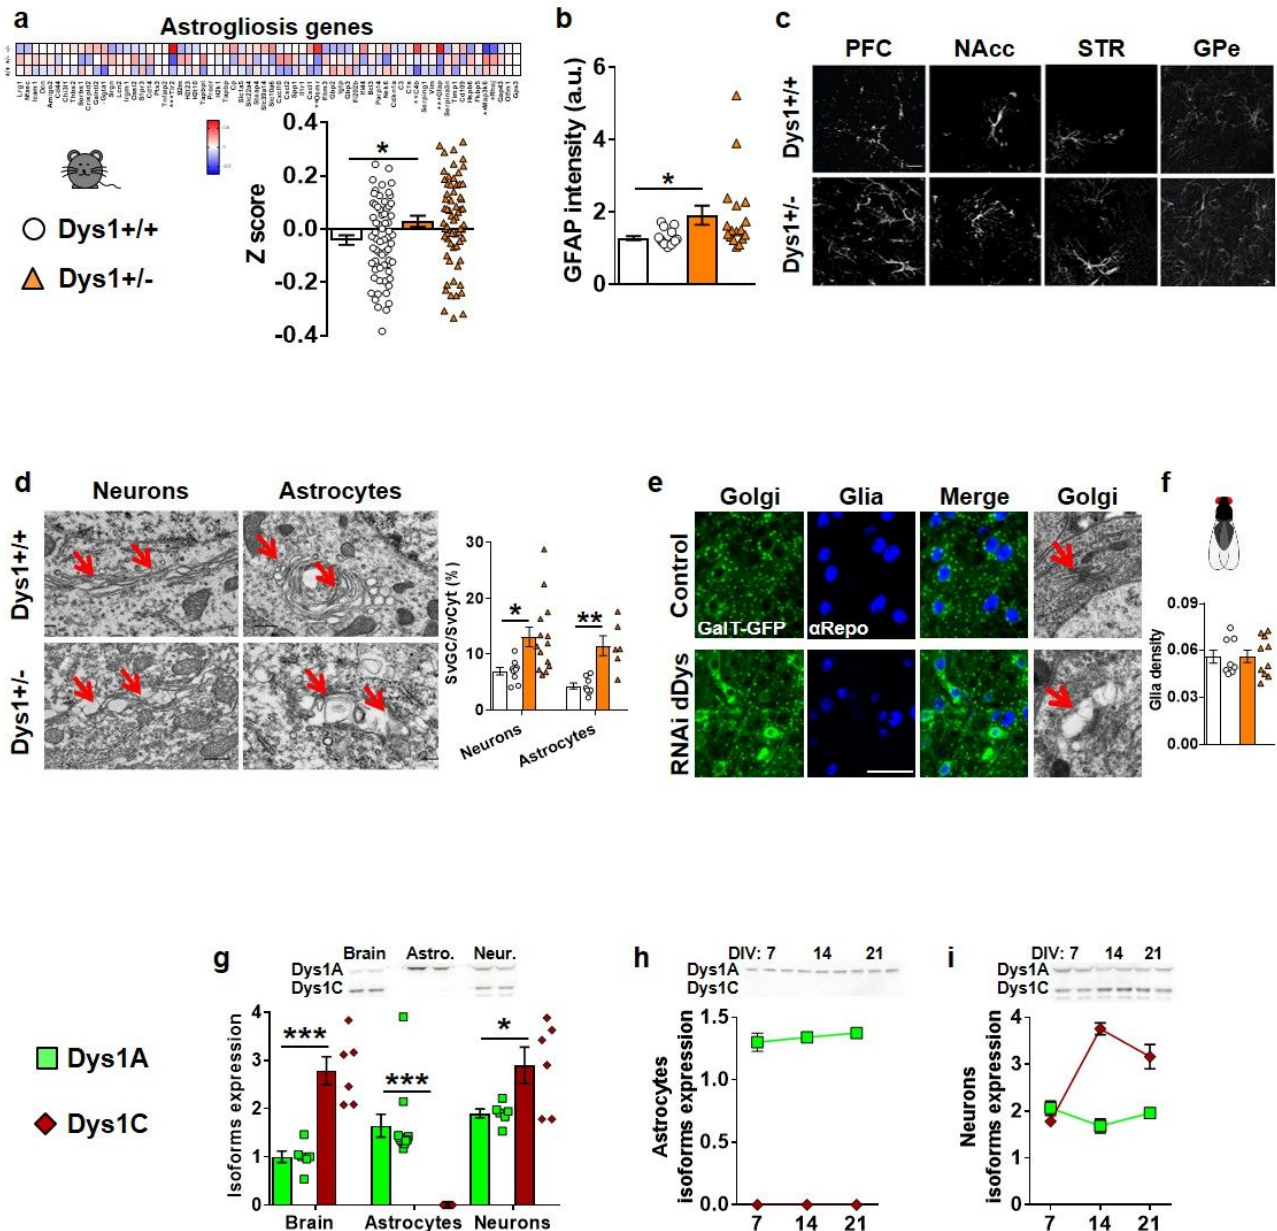

112

113 **Figure 1. Dys1 is involved in astrocytic activity.** **a.** Heat map of 65 inflammatory markers selected  
 114 by a microarray screening from Dys1+/+ (n24), and Dys1+/- (n25) littermates. The heat map is based  
 115 on hierarchical clustering of genes involved in inflammation states. All gene expression levels were  
 116 transformed to scores ranging from -0.5 to 0.5 and were colored blue, white, or red to represent low,  
 117 moderate, or high expression levels, respectively. The relative expression levels were scaled based  
 118 on their mean and do not represent expression levels in comparison with controls. Dys1+/- mice show  
 119 higher expression for these genes compared to Dys1+/+ littermates (t-test:  $t_{128}=-2.23$ ,  $p=0.028$ ).  
 120 \* $p<0.05$  vs Dys1+/+. **b.** Quantification of cumulative GFAP intensity from confocal images from  
 121 PFC, NAcc, STR and GPe displayed by Dys1+/+ and Dys1+/- littermates (n4/genotype, 1/brain re-  
 122 gion averaged from 9 samples each). Scale bars, 20 $\mu$ m (t-test:  $t_{31}=-2.32$ ,  $p=0.027$ ) \* $p<0.05$  vs  
 123 Dys1+/+. **c.** Representative confocal images of GFAP positive astrocytes in the analyzed brain re-  
 124 gions. **d.** Transmission electron microscopy (TEM) images of the Golgi Complex (GC) in neurons  
 125 and astrocytes in Dys1+/+ and Dys1+/- littermates. Surface density of GC (SvGC/SvCyt) in Dys1+/-  
 126 mice was significantly higher than in Dys1+/+ littermates (neurons  $t_{21}=-2.70$ ,  $p=0.013$ ; astrocytes  
 127  $t_{12}=-4.40$ ,  $p=0.0009$ ). \* $p<0.05$ , \*\* $p<0.001$  vs Dys1+/+.

128 ganglion cells, from *Drosophila* third instar larvae expressing UAS-GalT-GFP to visualize Golgi cis-  
129 ternae, for controls (tubulin-Gal4/+) and UAS-Dysb RNAi. Tissues were labeled with anti  $\alpha$ Repo  
130 antibody to visualize glial cells. Scale bar 20  $\mu$ m. On the right TEM images of third instar larvae brain  
131 showing the Golgi apparatus in the neuronal cell bodies of ventral ganglion for the above genotypes.  
132 Flies expressing UAS-RNAi Dybs ubiquitously showed swelling of largely inflated Golgi cisternae  
133 (arrows). Scale bar 500 nm. **f.** Quantification of the glial nuclei distribution in control (tubulin-  
134 Gal4/+) and RNAi Dysb/tubulin-Gal4 flies. **g.** Representative western blots and densitometric anal-  
135 ysis of Dys1A (50 kDa) and Dys1C (38 kDa) isoforms.  $\beta$ -actin used as loading control. In brain lysate  
136 of adult P90 mice both isoforms were revealed, with higher expression for Dys1C compared to Dys1A  
137 (t-test:  $t_{10}=-5.77$ ,  $p=0.0002$ ). Dys1A was the only isoform expressed in glial cells (t-test:  $t_{20}=-6.32$ ,  
138  $p<0.0001$ ). Similar to brain lysate, neuronal cultures show the expression of both isoforms with rel-  
139 ative higher levels of Dys1C (t-test:  $t_{10}=-2.57$ ,  $p=0.02$ ). **h.** Astrocytes cultures at different develop-  
140 mental time points (day 7=DIV7; day 14= DIV14; day 21= DIV21) confirming no expression of  
141 Dys1C in astrocytes. **i.** Neuronal cultures at different developmental time points (DIV7, 14 and 21)  
142 showing relative higher expression of Dys1C compared to Dys1A. Bar graphs show mean $\pm$ s.e.m.  
143



## 144 **Dys1A hypofunction alters Golgi complex morphology in astrocytes, but not in neurons**

145 The unique expression of Dys1A isoform in astrocytes prompted us to explore the effects of se-  
146 lective disruption of the Dys1A isoform using a mouse line with flanking LoxP sites targeted to the  
147 exon 5 of *Dtnbp1* on chromosome 13a (*Dys1A<sup>flox/flox</sup>*), backcrossed with a germline Cre deleter mouse  
148 line <sup>27</sup>.

149 *Dys1A<sup>+/-</sup>* and *Dys1A<sup>-/-</sup>* mice have a gene dosage-dependent reduction and lack of Dys1A isoform,  
150 respectively, with unaltered Dys1C expression (Fig. 2a and Supplementary Fig. S2). Notably, in con-  
151 trast to total Dys1 disruption (Fig. 1d), deletion of only Dys1A disrupted Golgi complex morphology  
152 in astrocytic cells, but not in neurons (Fig. 2b).

153 This further indicates a prominent role for Dys1A in astrocytic functioning.

154

## 155 **Dys1A disruption alters basal ganglia-dependent phenotypes**

156 To identify selective Dys1A-dependent behavioral functions, we next performed in *Dys1A* knock-  
157 out mice a comprehensive battery of tests previously applied to mice with disruption of both Dys1  
158 isoforms <sup>20, 26, 28, 29</sup>.

159 In agreement with an initial characterization <sup>27</sup>, *Dys1A<sup>+/-</sup>* and *-/-* mice were viable with no evident  
160 alterations in general health and sensory functions. Similar to this previous study, *Dys1A<sup>-/-</sup>* mice  
161 presented a slightly hyperactive phenotype compared with *Dys1A<sup>+/+</sup>* littermates (Fig. 2c), as in *Dys1*  
162 knockout mice <sup>26, 29</sup>. However, locomotor responses to both acute and sub-chronic amphetamine were  
163 not affected by deletion of *Dys1A* (Supplementary Fig. S2). In contrast to *Dys1* knockout mice <sup>28, 30</sup>,  
164 <sup>31</sup>, and in agreement with *Dys1A* mice <sup>27</sup>, no *Dys1A*-dependent alterations were evident in different  
165 social interaction tests (Supplementary Fig. S2). These results indicate that *Dys1A* is involved in  
166 locomotor activity, but not social interactions.

167 *Dys1* is associated with lower executive function performance in mice, healthy humans, and pa-  
168 tients with schizophrenia <sup>20, 26</sup>. Thus, we tested *Dys1A* mice in the attentional set-shifting task  
169 (ASST), which allows assessment of discrete cognitive executive functions with translational validity

170 to humans<sup>20,32</sup>. In contrast to *Dys1* knockout mice, *Dys1A*<sup>+/-</sup> and <sup>-/-</sup> mice did not show any deficits  
171 in extradimensional set-shifting (EDS) but an alteration in serial reversal learning (Supplementary  
172 Fig. S2). EDS alterations imply dopamine dysfunctions in PFC<sup>32,33</sup>, while serial reversal learning is  
173 linked to dopaminergic tone in striatal regions<sup>32,34</sup>. This prompted us to assess behaviors more related  
174 to basal ganglia dopamine-related functioning.

175 Prepulse inhibition (PPI) deficits are consistently linked to overactive dopamine/D2 signaling in  
176 basal ganglia<sup>35-37</sup>. We found a gene-dosage effect for reduced PPI in *Dys1A*<sup>+/-</sup> and <sup>-/-</sup> compared  
177 with *Dys1A*<sup>+/+</sup> littermates (Fig. 2d). No *Dys1A*-dependent effects were evident for acoustic startle  
178 responses or body weight (Supplementary Fig. S2), excluding potential confounding factors.

179 Motivation to receive a reward is another behavioral trait strongly related to dopaminergic func-  
180 tioning within the basal ganglia<sup>38-40</sup>. We found reduced reward-motivated behavior in *Dys1A*<sup>+/-</sup> and  
181 <sup>-/-</sup> compared with *Dys1A*<sup>+/+</sup> littermates (Fig. 2e), when tested in a progressive ratio paradigm de-  
182 signed to assess motivational processes<sup>41</sup>. No *Dys1A*-dependent differences were present during ac-  
183 quisition phases (Supplementary Fig. S2), excluding deficits in motor coordination, learning and  
184 memory.

185 Overall, these findings point to a prominent involvement of *Dys1A* in behavioral phenotypes me-  
186 diated by dopaminergic signaling in the basal ganglia (Fig. 2f).

187

188

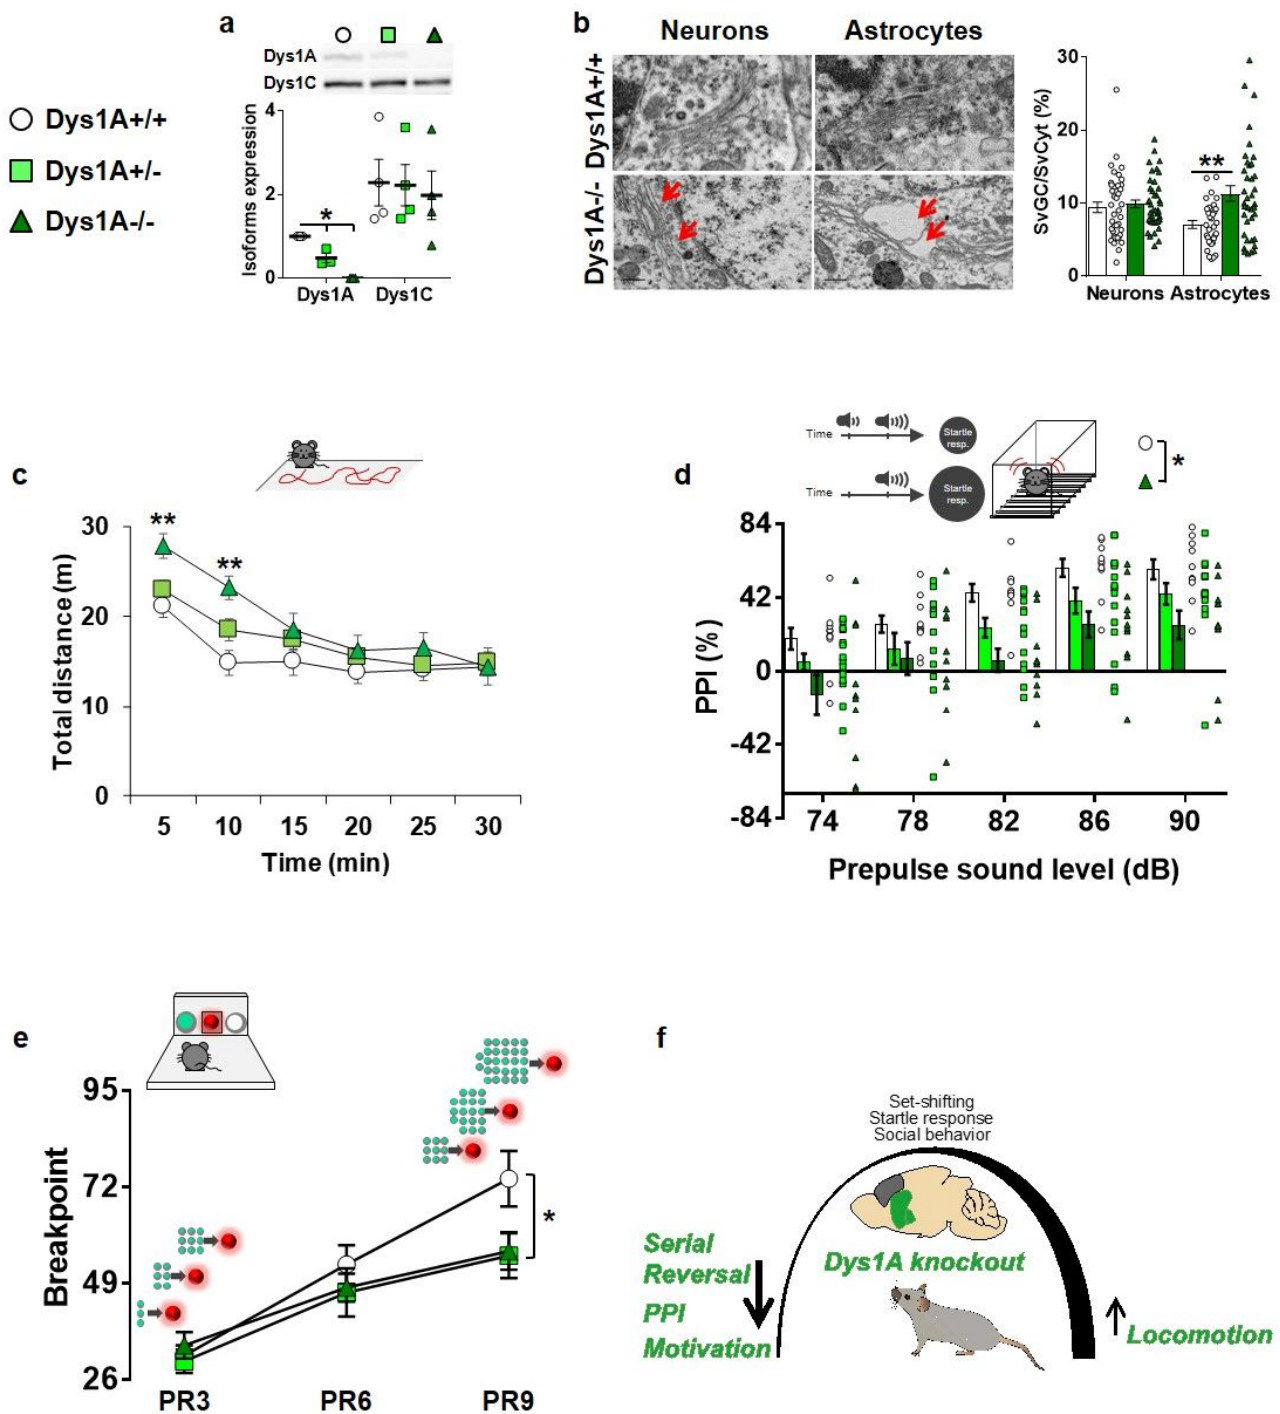

189

190 **Figure 2. Dys1A disruption impairs basal ganglia-, but not PFC-dependent, behaviors.** **a.** Selective  
 191 reduction of Dys1A does not affect Dys1C expression. Western blots and densitometric analysis  
 192 in Dys1A+/+, +/- and -/- littermates. Expression of Dys1A (50 kDa), Dys1C (38 kDa).  $\beta$ -actin used  
 193 as loading control. Expression of Dys1A is reduced in Dys1A+/- and absent in Dys1A-/- in PFC  
 194 (One-way ANOVA,  $F_{2,6}=60.48$ ;  $p<0.0005$ ). \* $p<0.01$  vs Dys1A+/+ littermates. Expression of Dys1C  
 195 was intact across all genotypes (One-way ANOVA,  $F_{2,9}=0.09$ ;  $p=0.92$ ). n4 mice/group. **b.** Repre-  
 196 sentative transmission electron microscopy (TEM) images of the Golgi Complex (GC, red arrows)  
 197 from Dys1A+/+ and Dys1A-/- littermates in neuronal and astrocytic cells. Surface density of GC  
 198 (SvGC/SvCyt) in Dys1A-/- was not altered in neurons (t-test:  $t_{80}=-0.54$ ,  $p=0.59$ ), but significantly

199 increased compared with *Dys1A*<sup>+/+</sup> control mice in astrocytic cells (t-test:  $t_{68}=-3.38$ ,  $p<0.001$ ).  
200 **\*\*** $p<0.001$  vs *Dys1A*<sup>+/+</sup> littermates. **c.** Spontaneous distance traveled by *Dys1A*<sup>+/+</sup> (n17), *Dys1A*<sup>+/-</sup>  
201 (n22) and *Dys1A*<sup>-/-</sup> (n10) during 30-min exposure to an open field arena. *Dys1A*<sup>-/-</sup> show increased  
202 locomotion during the first 10 min in the open field (Two-way repeated measure ANOVA, time\*gen-  
203 otype interaction:  $F_{10,215}=3.04$ ;  $p=0.001$ ). **\*\*** $p<0.005$  vs *Dys1A*<sup>+/+</sup> at the same time point. **d.** Percent-  
204 age PPI of the 120dB acoustic startle response displayed by *Dys1A*<sup>+/+</sup> (n10), *Dys1A*<sup>+/-</sup> (n15) and  
205 *Dys1A*<sup>-/-</sup> (n12) littermates. *Dys1A*<sup>-/-</sup> have lower pre-pulse intensities compared to *Dys1A*<sup>+/+</sup> mice  
206 (Two-way repeated measure ANOVA; genotype:  $F_{2,34}=4.44$   $p=0.019$ ). **\*** $p<0.01$  vs *Dys1A*<sup>+/+</sup>. **e.**  
207 Breakpoint during a food-driven operant behavior test with increasing progressive ratio (PR) dis-  
208 played by *Dys1A*<sup>+/+</sup> (n12), *Dys1A*<sup>+/-</sup> (n13) and *Dys1A*<sup>-/-</sup> (n10) littermates. Both *Dys1A*<sup>+/-</sup> and  
209 *Dys1A*<sup>-/-</sup> mice showed lower breakpoints than *Dys1A*<sup>+/+</sup> mice (Two-way repeated measures  
210 ANOVA; genotype:  $F_{4,64}=2.8$ ;  $p=0.032$ ). **\*** $p<0.05$  vs *Dys1A*<sup>+/+</sup>. **f.** Schematic drawing summarizing  
211 the behavioral data obtained in *Dys1A* knockout mice, pointing to a major alteration of basal ganglia-  
212 dependent, but not PFC-dependent, phenotypes.  
213

## 214 **Dys1A disruption alters dopamine/D2 homeostasis in basal ganglia**

215 Dopaminergic signaling in basal ganglia is implicated in locomotion, motivation, serial reversal  
216 learning, and PPI<sup>34, 35, 37</sup>, which are altered in Dys1A knockout mice. Thus, we assessed Dys1A  
217 modulation of dopaminergic system in basal ganglia and PFC, as comparison.

218 We first revealed a relative increased expression of Dys1A in GPe compared to PFC and STR  
219 (Fig. 3a). Notably, GPe is a brain region enriched in astrocytes<sup>10</sup>. In contrast, Dys1C was equally  
220 expressed in all regions considered (Fig. 3b).

221 Dys1A disruption increased the expression of total D2 receptors in GPe, but not in PFC or STR  
222 (Fig. 3c). Moreover, Dys1A disruption increased cellular surface D2 receptors in STR and GPe, but  
223 not in PFC (Fig. 3d). Notably, disruption of both Dys1 isoforms resulted in comparable phenotypes  
224 in both PFC and striatal regions<sup>20, 26</sup> Supplementary Fig. S3). Similarly, a Dys1A genotypic effect  
225 on dopamine content was present in STR and GPe, but not in PFC (Fig. 3e-g). In particular, Dys1A-  
226 *-/-* mice had lower dopamine levels than Dys1A<sup>+/+</sup> in both STR and GPe, and lower HVA levels in  
227 STR (Fig. 3f-g). DOPAC/dopamine and HVA/dopamine ratios were indistinguishable across geno-  
228 types in all regions, suggesting a normal rate of dopamine catabolism (Supplementary Fig. S3). No  
229 Dys1A genotype effects on levels of noradrenaline, serotonin, and 5HIAA were evident (Supplemen-  
230 tary Fig. S3).

231 Thus, consistent with our behavioral assessments, selective disruption of the Dys1A isoform al-  
232 tered the dopaminergic system in basal ganglia, but not in PFC.

233

## 234 **Dys1A is reduced in the caudate of schizophrenia cases**

235 To verify if Dys1A-modulation of basal ganglia-related phenotypes may have clinical relevance,  
236 we measured Dys1 isoforms in the caudate of schizophrenia cases and matched healthy controls (Sup-  
237 plementary Fig. S4). This revealed reduced Dys1A, but not Dys1C, in patients with schizophrenia  
238 compared with controls (Fig. 3h). Notably, previous findings reported reduced Dys1C, but not  
239 Dys1A, in the PFC of patients with schizophrenia<sup>15</sup>. To directly compare our results to previous

240 reports, we calculated a mean case control ratio where zero indicates no differences between cases  
241 and controls, negative values reduced expression in schizophrenia, and positive values increased ex-  
242 pression. In the caudate, Dys1A was reduced in 15 out of 22 case-control pairs, while Dys1C ratios  
243 were inconsistent in direction, and of generally smaller magnitude (Fig. 3i). Together, these data  
244 suggest that Dys1A may have a role in basal ganglia-related schizophrenia pathobiology.  
245

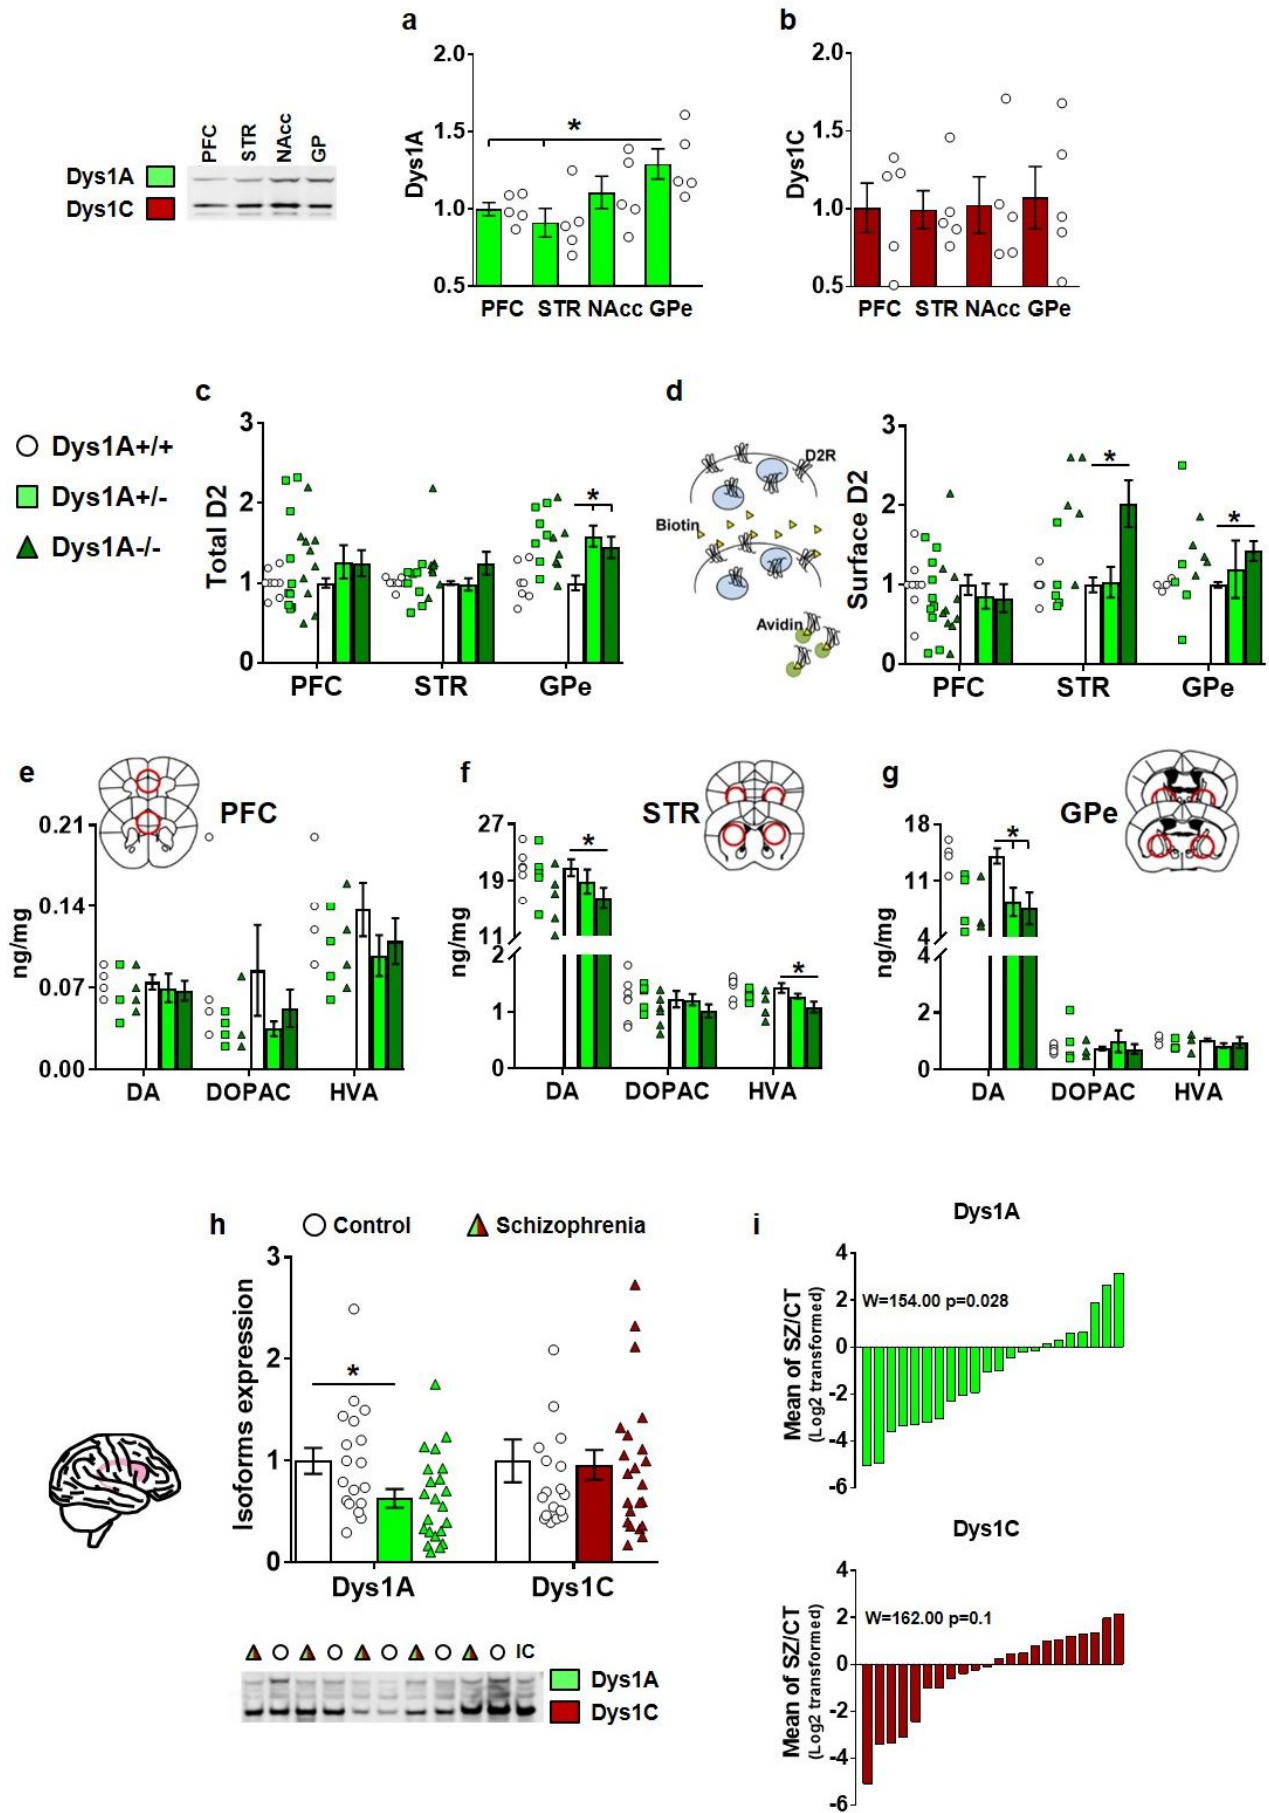

247 **Figure 3. Dys1A alters dopaminergic signaling within the basal ganglia, but not in PFC, and is**  
248 **reduced in the caudate of patients with schizophrenia.** Protein expression displayed by C57BL6J  
249 adult mice of **a.** Dys1A and **b.** Dys1C isoforms in the PFC, STR, NAcc, and GPe relative to PFC and  
250 normalized to their own  $\beta$ -actin. Dys1A expression is higher in GPe compared to PFC and STR (One-  
251 way ANOVA:  $F_{3,16}=5.02$ ;  $p=0.02$ ).  $*p<0.05$  vs PFC and STR. Dys1C expression is uniform across  
252 the selected brain areas (One-way ANOVA:  $F_{3,16}=0.045$ ;  $p=0.98$ ). **c-d.** D2 receptor expression in  
253 Dys1A<sup>+/+</sup> (n9), Dys1A<sup>+/-</sup> (n10) and Dys1A<sup>-/-</sup> (n10). Synaptophysin used as cytoplasmic control,  
254 and D2 expression normalized on transferrin as loading control. **c.** Dys1A<sup>+/-</sup> and Dys1A<sup>-/-</sup> mice  
255 show increased total D2 expression compared to Dys1A<sup>+/+</sup> in GPe (One-way ANOVA:  $F_{2,16}=4.93$ ;  
256  $p=0.021$ ), but not in PFC ( $F_{2,25}=0.724$ ;  $p=0.49$ ), and STR (One-way ANOVA:  $F_{2,22}=1.44$ ;  $p=0.26$ ). **d.**  
257 Biotinylation protocol, brain slices treated with biotin to label all surface proteins, precipitated by  
258 streptavidin. Dys1A<sup>-/-</sup> mice had increased expression of D2 receptors on cellular surface compared  
259 to Dys1A<sup>+/+</sup> littermates in STR and GPe (One-way ANOVA: STR  $F_{2,14}=4.20$ ;  $p=0.04$ ; GPe  
260  $F_{1,6}=6.18$ ;  $p=0.04$ ), but not in PFC (One-way ANOVA:  $F_{2,24}=0.44$ ;  $p=0.64$ ).  $*p<0.05$  vs Dys1A<sup>+/+</sup>.  
261 **e-g.** Dopamine (DA), DOPAC, and HVA content by HPLC, expressed as ng/mg of tissue in **e.** PFC,  
262 **f.** STR, and **g.** GPe dissected from Dys1A<sup>+/+</sup> (n4), Dys1A<sup>+/-</sup> (n4), and Dys1A<sup>-/-</sup> (n4) littermates. No  
263 Dys1A-dependent changes were observed in PFC (One-way ANOVA:  $F_{2,5}=0.23$ ;  $p=0.80$ ). Dys1A<sup>-/-</sup>  
264 show reduced DA and HVA levels relative to Dys1A<sup>+/+</sup> in the STR (One-way ANOVA:  $F_{1,10}=5.17$ ;  
265  $p=0.05$ ). Dys1A<sup>+/-</sup> and Dys1A<sup>-/-</sup> show reduced DA levels than Dys1A<sup>+/+</sup> in GPe ( $F_{1,10}=10.44$ ;  
266  $p=0.02$ ).  $*p<0.05$  vs Dys1A<sup>+/+</sup>. **h.** Expression of Dys1A and Dys1C isoforms in postmortem caudate  
267 from 22 patients with schizophrenia (Schizophrenia) and 18 matched healthy subjects (Control). No  
268 differences were present in non-diagnostic variables (i.e., age, sex, post-mortem interval, pH: Sup-  
269 plementary Fig. S4). Expression of Dys1A, normalized by  $\beta$ -actin, is significantly reduced in the  
270 caudate of patients with schizophrenia compared to control subjects (t-test:  $p=0.02$ ). Dys1C expres-  
271 sion is not changed between the two groups (t-test:  $p=0.71$ ).  $*p<0.05$  vs Control. **i.** Plotting of  $\beta$ -actin  
272 normalized data for Dys1A and Dys1C for all case-control pairs. Each bar indicates the log<sub>2</sub> trans-  
273 formed ratio of isoform in a schizophrenia case compared to that in its matched control (i.e. the ratio  
274 for one case-control pair). Pair-wise analysis of these ratios (Wilcoxon signed-rank test) showed sig-  
275 nificant difference between schizophrenia cases and their matched controls for Dys1A ( $W=154.00$ ;  
276  $p=0.02$ ), but not for Dys1C ( $W=162.00$ ;  $p=1.00$ ). Bar graphs show mean  $\pm$  s.e.m.  
277



## 278 **Selective disruption of Dys1A in astrocytes**

279 To directly assess the specific role of astrocytic Dys1A in basal ganglia dopaminergic and behav-  
280 ioral phenotypes, we next backcrossed Dys1A<sup>flx/flx</sup> with inducible Glast CreERT2 mice (Fig. 4a).  
281 Selective deletion of Dys1A and expression of tdTomato reporter in astrocytes was triggered by ta-  
282 moxifen injection in adult Dys1AGlast mice, to exclude developmental effects. Employing fluores-  
283 cence-activated cell sorting (FACS), we isolated tdTomato-positive astrocytes from the striatal region  
284 (STR+GPe) of Dys1AGlast mice (Fig. 4b). We confirmed that these cells were enriched in Glast  
285 compared to tdTomato-negative cells (Fig. 4c). In agreement with previous reports<sup>42</sup>, the GlastCre-  
286 ERT2 system was very selective for astrocytes, as we found no traces of the NeuN neuronal marker  
287 in purified tdTomato-positive cells and equal Glast expression in Dys1AGlast<sup>+/+</sup> and <sup>-/-</sup> mice (Fig.  
288 4d). Importantly, Dys1A expression in Glast-positive astrocytes was abolished in Dys1AGlast<sup>-/-</sup> mice  
289 (Fig. 4e). Compared to Dys1AGlast<sup>+/+</sup> littermates, Dys1AGlast<sup>-/-</sup> mice showed the same GFAP sig-  
290 nal (Fig. 4f, and Supplementary Fig. S5), no alteration in astrocytes density (Fig. 4g), and similar  
291 astrocytic morphology (Fig. 4h).

292 These data demonstrate a selective inducible deletion of the Dys1A in astrocytes, with no major  
293 alterations in astrocytic anatomy.

294

## 295 **Dys1A disruption in astrocytes induces motivational and sensorimotor gating deficits**

296 To investigate the role played by astrocytic Dys1A in behavioral functions, we tested Dys1AGlast<sup>+/+</sup>,  
297 +/- and <sup>-/-</sup> mice for phenotypes that were altered by Dys1A disruption in all cell types (Fig. 2).

298 No Dys1AGlast genotype effect was evident in exploratory activity (Fig. 4i). Similar to ubiquitous  
299 Dys1A disruption, selective Dys1A deletion in astrocytes was sufficient to impair PPI sensorimotor  
300 gating abilities (Fig. 4j), while having no effects on startle reactivity or body weight (Supplementary  
301 Fig. S5). Furthermore, as observed in Dys1A knockout mice (Fig. 2), Dys1AGlast<sup>+/-</sup> and <sup>-/-</sup> mice  
302 showed reduced motivation to work for a rewarding stimulus (Fig. 4k), while no Dys1AGlast geno-  
303 type effects were evident on the acquisition of this operant task (Supplementary Fig. S5).

304 These results indicate a specific role for astrocytic Dys1A in modulating basal ganglia-related  
 305 sensorimotor gating and motivational processes.

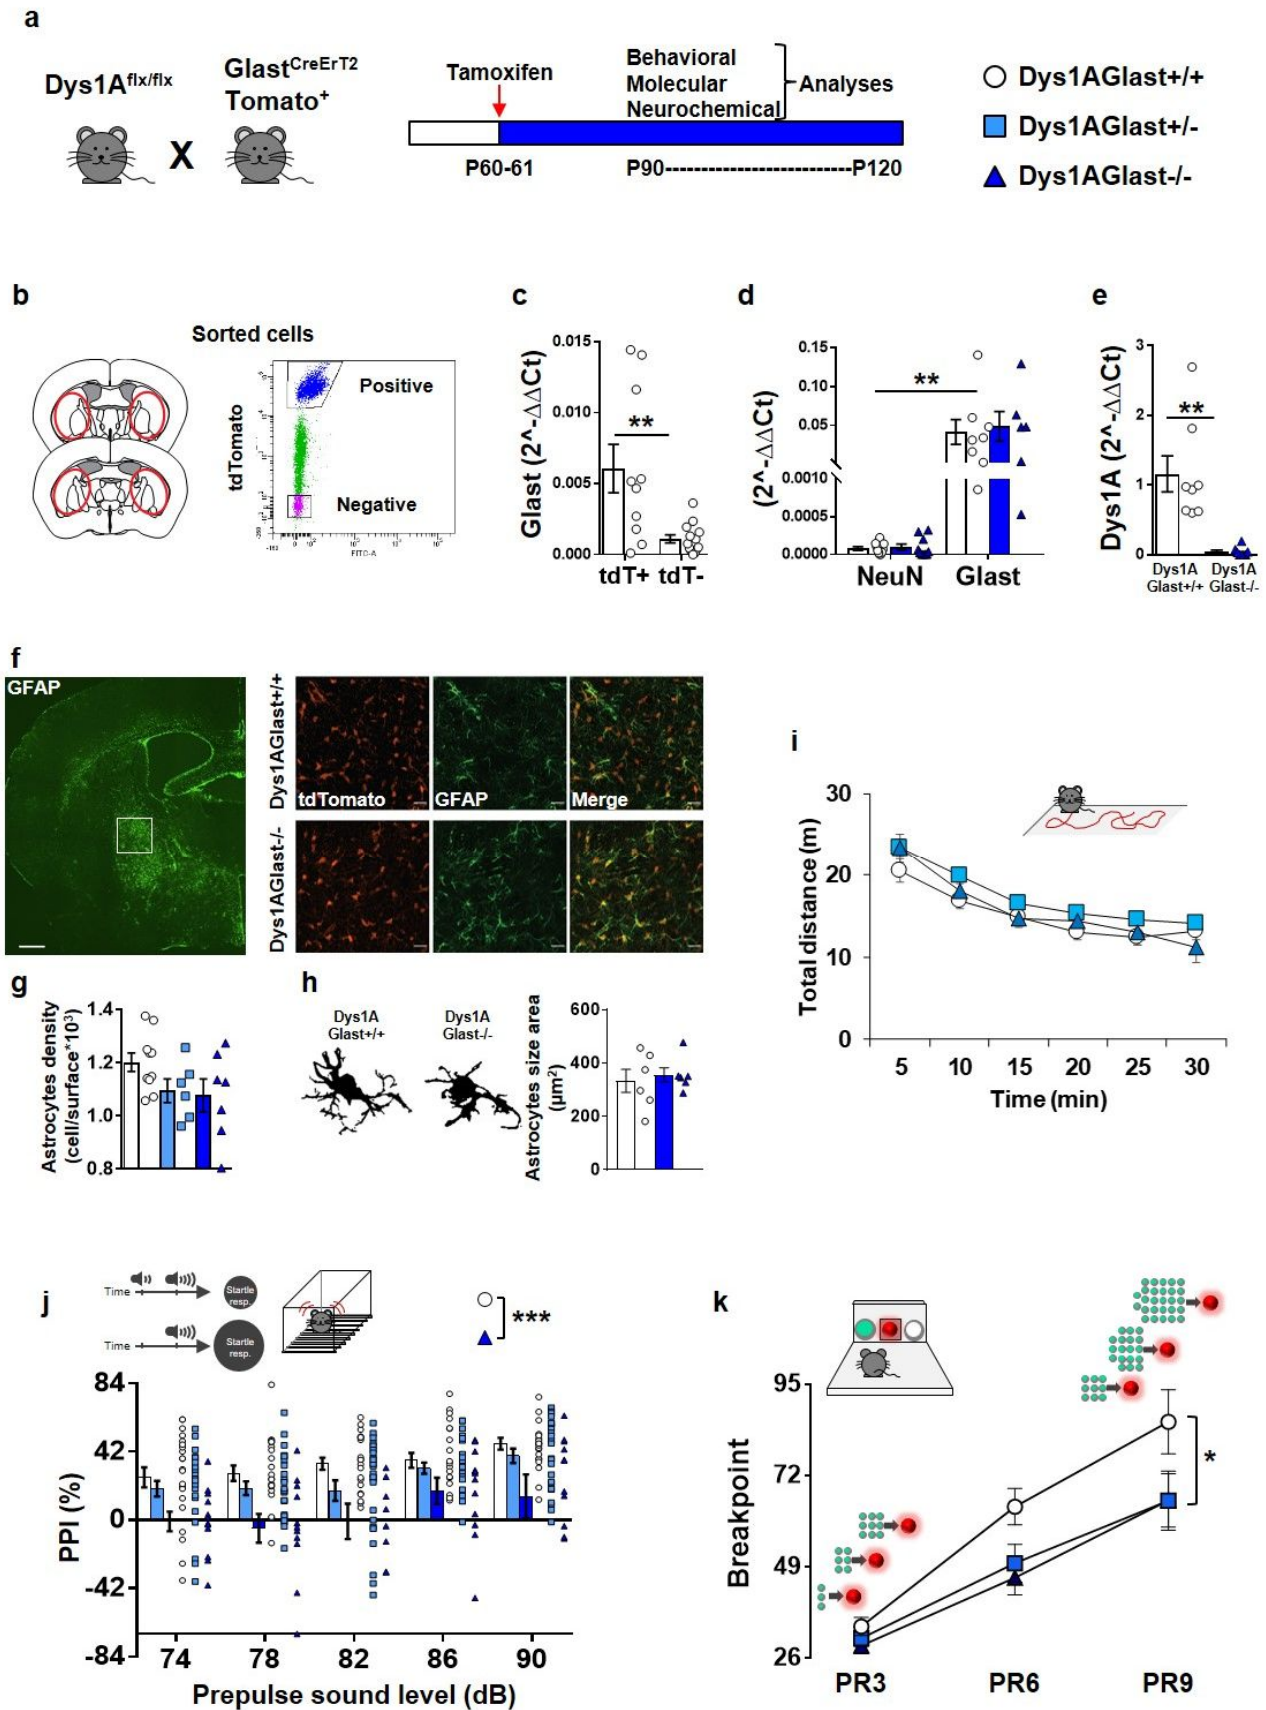

306

307 **Figure 4. Dys1A disruption in astrocytes is sufficient to induce sensorimotor gating and moti-**  
308 **vational deficits. a.** Experimental design and timeline to generate reduction (+/-) or absence (-/-) of  
309 Dys1A in astrocytes of adult mice subsequently subjected to molecular and behavioral evaluation.  
310 Dys1A floxed mice were bred with conditional Glast<sup>CreErT2</sup>Tomato<sup>+</sup> mice, and offspring were treated  
311 with tamoxifen at post-natal days 60-61 to then be tested between post-natal days 90-120. **b.** Experi-  
312 mental design, and gating strategy to FACS-sorted astrocytes for subsequent RT-qPCR analyses. **c.**  
313 Relative mRNA expression of Glast assessed by RT-qPCR in tdTomato-positive (tdT+) and  
314 tdTomato-negative (tdT-) cells sorted from the basal ganglia of Dys1AGlast<sup>+/+</sup> (n10) and  
315 Dys1AGlast<sup>-/-</sup> (n13) mice. tdT+ cells show increased expression of Glast compared to tdT- cells (t-  
316 test:  $t=3.25$ ,  $df=21$ ,  $p<0.005$ ). **\*\*** $p<0.005$  tdT+ vs tdT- cells. **d.** Relative mRNA expression of NeuN  
317 and Glast assessed by RT-qPCR in tdTomato-positive cells sorted from the basal ganglia of  
318 Dys1AGlast<sup>+/+</sup> (n10) and Dys1AGlast<sup>-/-</sup> (n10) mice. tdTomato-positive cells show an equal expres-  
319 sion of Glast in Dys1AGlast<sup>+/+</sup> and Dys1AGlast<sup>-/-</sup> mice (Two-way ANOVA; genotype effect:  
320  $F_{1,12}=0.084$ ;  $p=0.78$ ), but no detectable levels of NeuN (Two-way ANOVA; gene expression:  
321  $F_{1,12}=13.16$ ;  $p=0.003$ ). **\*\*** $p<0.005$  Glast vs NeuN. Expression levels were normalized by Gapdh ex-  
322 pression. **e.** Relative mRNA expression of the Dys1A isoform assessed by RT-qPCR in tdTomato-  
323 positive cells sorted through FACS from the basal ganglia of Dys1AGlast<sup>+/+</sup> (n8) and Dys1AGlast<sup>-/-</sup>  
324 (n8) mice, showing the abolishment of Dys1A expression from Glast-positive astrocytes in the  
325 latter group (One-way ANOVA;  $F_{1,14}=18.32$ ;  $p=0.0008$ ). **\*\*** $p<0.005$  vs Dys1AGlast<sup>+/+</sup>. Expression  
326 levels are normalized by Gapdh expression. Data shown as fold-change compared with  
327 Dys1AGlast<sup>+/+</sup> control mice. **f.** Left: representative 10x confocal images of GFAP-stained brain sec-  
328 tion at the level of GPe, white square indicates the area magnified 20x for subsequent analyses (scale  
329 bar 500 $\mu$ m); right: representative 20x confocal images of GPe brain sections from Dys1AGlast<sup>+/+</sup>  
330 and <sup>-/-</sup> mice showing Glast/tdTomato-positive astrocytes and GFAP-immunoreactivity (scale bar  
331 20 $\mu$ m). **g.** There was no difference in Glast/tdTomato-positive astrocytes density in the GPe (1000  
332 cells x mm<sup>2</sup>) between Dys1AGlast<sup>+/+</sup> (10), Dys1AGlast<sup>+/-</sup> (6), and Dys1AGlast<sup>-/-</sup> (7) mice (One-  
333 way ANOVA:  $F_{2,20}=2.33$ ;  $p=0.12$ ). **h.** Representative images and quantification of GFAP and Glast-  
334 positive astrocytes morphology in the GPe of Dys1AGlast<sup>+/+</sup> (n6) and Dys1AGlast<sup>-/-</sup> (n6) mice. No  
335 genotype-dependent difference was observed in the astrocytic surface area measured by GFAP im-  
336 munoreactivity (t-test:  $t_{10}=-0.46$ ,  $p=0.65$ ). **i.** Spontaneous distance traveled by Dys1AGlast<sup>+/+</sup> (n20),  
337 Dys1AGlast<sup>+/-</sup> (n24), and Dys1AGlast<sup>-/-</sup> (n11) during 30 minutes exposure to an open field arena.  
338 No genotype differences were evident (Two-way repeated measure ANOVA, genotype effect:  
339  $F_{2,52}=2.79$ ;  $p=0.07$ ; time\*genotype effect:  $F_{10,260}=0.91$ ;  $p=0.53$ ). **j.** Percent pre-pulse inhibition (PPI)  
340 of the 120dB acoustic startle response displayed by Dys1AGlast<sup>+/+</sup> (n21), Dys1AGlast<sup>+/-</sup> (n24), and  
341 Dys1AGlast<sup>-/-</sup> (n13) littermates. Dys1AGlast<sup>-/-</sup> have reduced PPI compared to Dys1AGlast<sup>+/+</sup> mice  
342 (Two-way repeated measure ANOVA; genotype effect:  $F_{2,54}=8.59$   $p=0.0006$ ). **\*\*\*** $p<0.0005$  vs  
343 Dys1AGlast<sup>+/+</sup>. **k.** Breakpoint during a food-driven operant behavior test with increasing progressive  
344 ratio (PR) displayed by Dys1AGlast<sup>+/+</sup> (n15), Dys1AGlast<sup>+/-</sup> (n15), and Dys1AGlast<sup>-/-</sup> (n9) litter-  
345 mates. Both Dys1AGlast<sup>+/-</sup> and Dys1AGlast<sup>-/-</sup> mice showed lower breakpoints than Dys1AGlast<sup>+/+</sup>  
346 mice (Two-way repeated measure ANOVA; genotype effect:  $F_{2,36}=4.35$ ;  $p=0.020$ ). **\*** $p<0.05$  vs  
347 Dys1AGlast<sup>+/+</sup>. Bar and line graphs show mean  $\pm$  s.e.m.

348 **Dys1A disruption in astrocytes alters basal ganglia dopamine homeostasis and increases D2 in**  
349 **astrocytes**

350 We then investigated the effects of astrocytic Dys1A on dopaminergic signaling in basal ganglia.

351 Similar to ubiquitous Dys1A disruption (Fig. 3), astrocytic Dys1A disruption reduced dopamine  
352 levels primarily in GPe and marginally in STR (Fig. 5a). No effects were observed in PFC (Supple-  
353 mentary Fig. S5). No Dys1AGlast effect was evident for DOPAC levels (Fig 5b), while HVA levels  
354 were reduced in Dys1AGlast knockout mice compared with wild-type littermates in both STR and  
355 GPe (Fig. 5c). These findings demonstrate that disruption of Dys1A in astrocytes is sufficient to re-  
356 duce dopamine levels, primarily in GPe.

357 We next assessed the impact of Dys1A disruption in astrocytes on the expression of genes involved  
358 in dopaminergic signaling and metabolism in purified astrocytes isolated from the basal ganglia re-  
359 gion (Fig. 5d). We found detectable levels of mRNA expression for dopamine receptors D1, D2, and  
360 D3, for the plasma membrane dopamine (DAT) and organic cation 3 (OCT3) transporters, and the  
361 metabolic enzyme monoamine oxidase type B (MAOB (Fig. 5e). No detectable signals were evident  
362 for tyrosine hydroxylase (TH), the rate-limiting enzyme in dopamine synthesis, and for the vesicular  
363 monoamine transporter VMAT2 that has been implicated in astrocytic dopamine homeostasis in PFC  
364 <sup>3</sup>. We excluded neuronal contamination, as no detectable levels of the NeuN marker were found (Fig.  
365 5e).

366 Among all these markers, only astrocytic expression of dopamine D2 receptor was altered, with  
367 Dys1AGlast<sup>-/-</sup> mice showing higher D2 mRNA level than Dys1AGlast<sup>+/+</sup> (Fig. 5f). This is in ac-  
368 cordance with and extends the effects of ubiquitous disruption of Dys1 on expression of D2 receptors  
369 in basal ganglia (Supplementary Fig. S6). Similarly, in drosophila, ubiquitous, glia- or neuron-spe-  
370 cific disruption of dDys equivalently increased D2 expression (Supplementary Fig. S6). Notably, we  
371 confirmed by flow cytometry an increased protein expression of D2 receptors on the surface of  
372 Glast/*tdTomato* positive astrocytes from Dys1AGlast<sup>-/-</sup> mice compared with Dys1AGlast<sup>+/+</sup> (Fig.  
373 5g). In these same mice, no genotype-dependent differences in D2 protein expression were evident

374 on *Glast*/tdTomato negative cells (Fig. 5g), confirming the selective upregulation of D2 receptor in  
375 astrocytes upon *Dys1A* disruption, without any compensatory D2 perturbation in other cells.

376 These data suggest that *Dys1A*-dependent behavioral and dopaminergic alterations might relate to  
377 increased astrocytic D2 mechanisms.

378

### 379 ***Dys1A* disruption in astrocytes alters D2-dependent dopamine dynamics in GPe**

380 We then investigated the impact of astrocytic *Dys1A* deficiency on D2-mediated dopamine modula-  
381 tion in GPe *in vivo*.

382 Local GPe perfusion by reverse microdialysis of the dopamine D2-like receptor agonist quinpirole  
383 reduced dopamine outflow in *Dys1AGlast*<sup>+/+</sup> mice (Fig. 5h, Supplementary Fig. S5). Similarly, sys-  
384 temic injection of quinpirole reduced dopamine binding in *Dys1AGlast*<sup>+/+</sup> mice (Fig. 5i), as revealed  
385 by the dopamine-sensor dLight fiberphotometry<sup>43</sup>. In contrast, both indices of D2-mediated dopa-  
386 mine modulation were lost in *Dys1AGlast*<sup>-/-</sup> mice (Fig. 5h, i). The effect of amphetamine on dopa-  
387 mine binding was unaltered by astrocytic *Dys1A* deletion (Supplementary Fig. S5), in line with be-  
388 havioral findings (Supplementary Fig. S2), and strengthening a preferential link of astrocytic *Dys1A*  
389 with D2 functioning.

390 Overall, these data demonstrate that astrocytic D2 overexpression, upon astrocytic *Dys1A* disrup-  
391 tion, is associated with loss of D2-mediated inhibition of dopamine release in basal ganglia. This  
392 extends other evidence implicating astrocytes in the inhibitory control of dopamine release within the  
393 basal ganglia<sup>10,44</sup>.

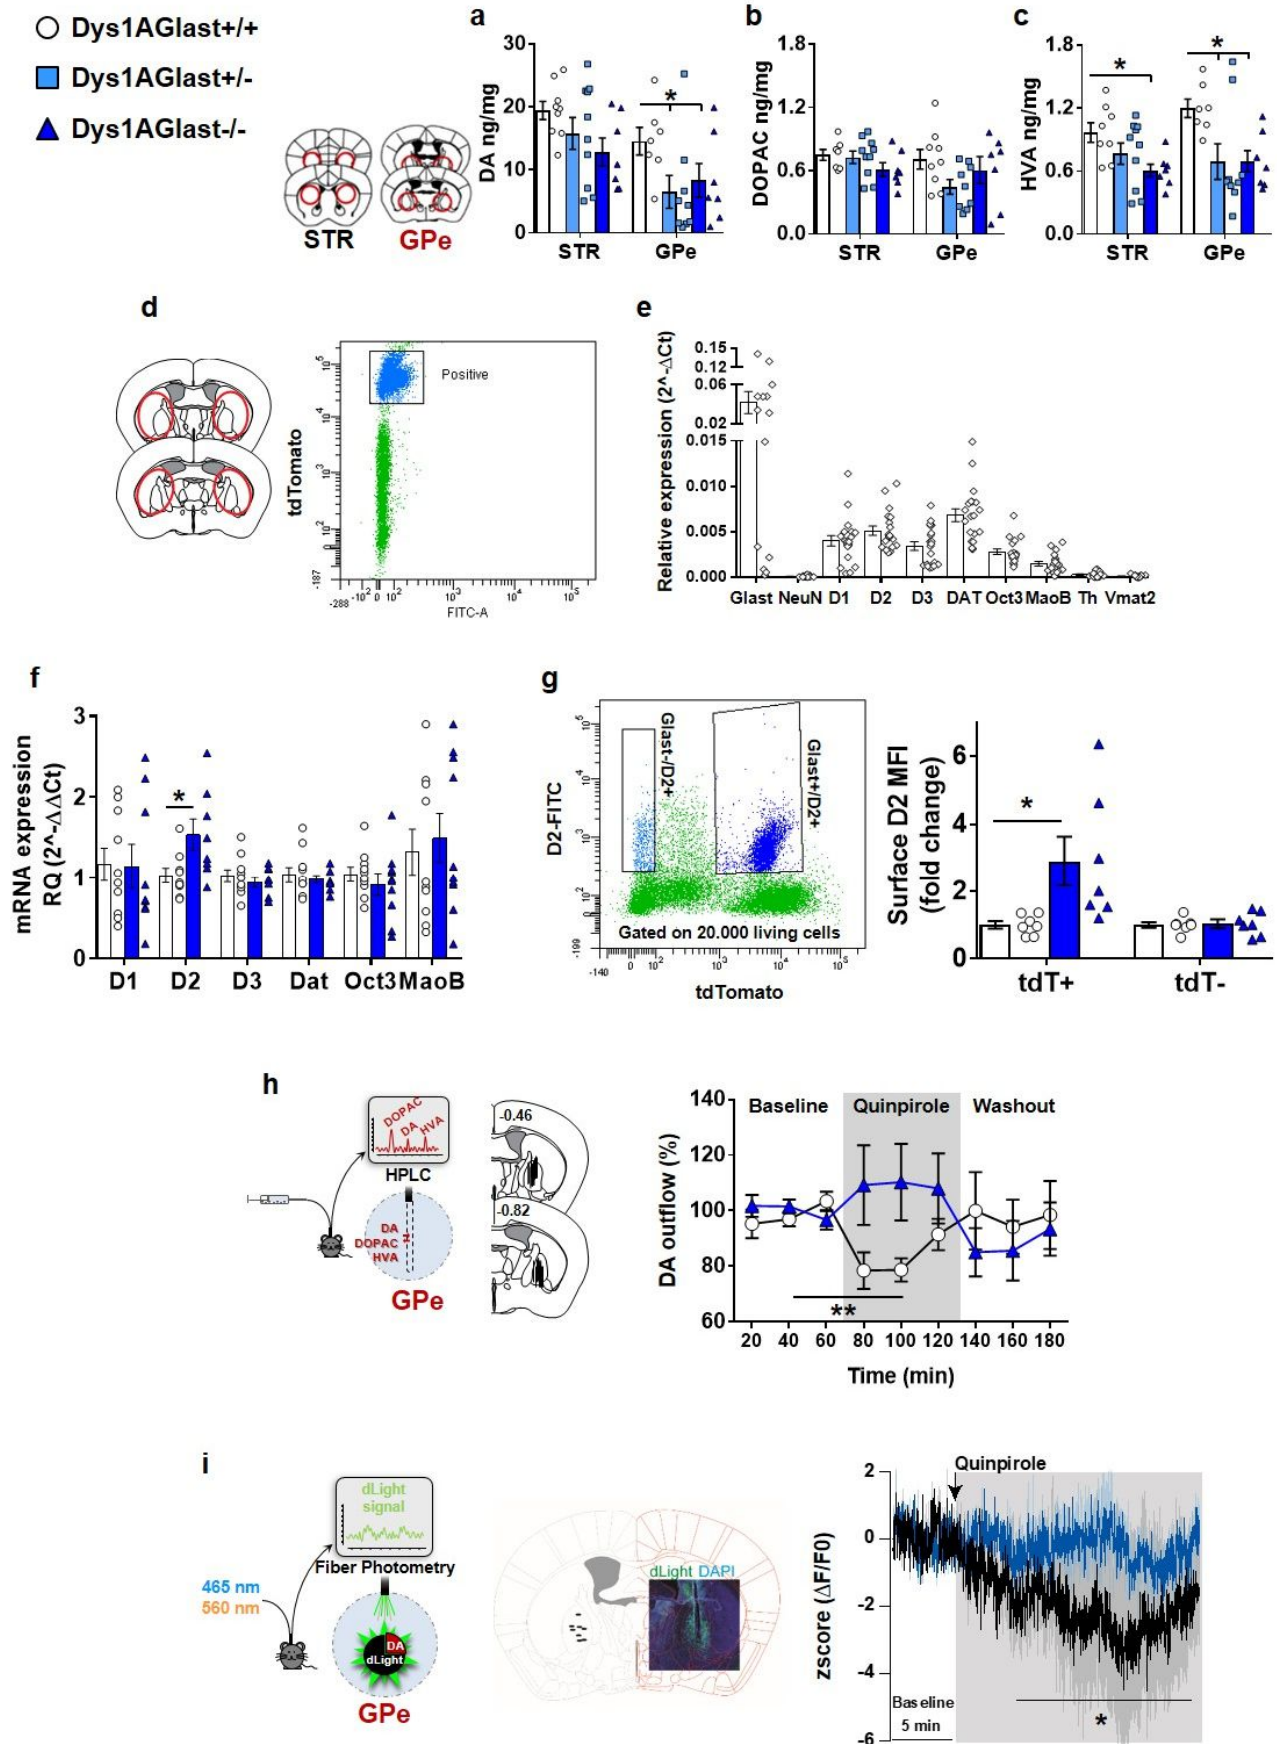

394

395 **Figure 5. Dys1A disruption in astrocytes alters dopamine/D2 homeostasis in basal ganglia. a.**  
 396 Dopamine (DA), **b.** DOPAC, and **c.** HVA content by HPLC analyses, expressed as ng/mg of dissected

397 STR or GPe tissues displayed by Dys1AGlast<sup>+/+</sup> (n9), Dys1AGlast<sup>+/-</sup> (n10), and Dys1AGlast<sup>-/-</sup> (n7)  
398 littermates. In the STR, Dys1AGlast<sup>-/-</sup> had reduced HVA levels (One-way ANOVA:  $F_{2,22}=3.52$ ;  
399  $p=0.04$ ), but no alterations in DA (One-way ANOVA:  $F_{2,23}=2.15$ ;  $p=0.14$ ), and DOPAC levels (One-  
400 way ANOVA:  $F_{2,21}=1.40$ ;  $p=0.27$ ), compared to Dys1AGlast<sup>+/+</sup> mice. In the GPe, Dys1AGlast<sup>-/-</sup>  
401 had reduced DA (One-way ANOVA:  $F_{2,21}=5.34$ ;  $p=0.03$ ), and HVA levels (One-way ANOVA:  
402  $F_{2,20}=4.46$ ;  $p=0.02$ ), but no alterations in DOPAC (One-way ANOVA:  $F_{2,22}=2.08$ ;  $p=0.15$ ), compared  
403 to Dys1AGlast<sup>+/+</sup> mice. \* $p<0.05$  vs Dys1AGlast<sup>+/+</sup> mice. **d.** Gating strategy to FACS-sorted astro-  
404 cytes from STR+GPe regions for subsequent RT-qPCR analyses for astrocytic dopaminergic mark-  
405 ers. **e.** Relative mRNA expression of Glast, NeuN, dopamine receptors (D1, D2, D3), Dat, Oct3,  
406 MaoB, TH, and Vmat2 assessed by RT-qPCR in tdTomato-positive cells sorted from basal ganglia  
407 (STR+GPe) of Dys1AGlast<sup>+/+</sup> and Dys1AGlast<sup>-/-</sup> mice (n20). tdTomato-positive cells show no de-  
408 tectable levels of NeuN, Th and Vmat2. Expression levels are normalized by Gapdh mRNA expres-  
409 sion. **f.** Relative mRNA expression of dopamine receptors (D1, D2, D3), Dat, Oct3 and MaoB, as-  
410 sessed by RT-qPCR in tdTomato-positive cells sorted from basal ganglia of Dys1AGlast<sup>+/+</sup> (n10)  
411 and Dys1AGlast<sup>-/-</sup> (n10) littermates, revealing an increased astrocytic D2 receptor expression in Dys-  
412 Glast<sup>-/-</sup> mice (t-tests:  $t_{17}=-2.42$ ,  $p=0.029$ ), and no genotype effect for the other assessed makers (D1:  
413  $t_{17}=0.07$ ,  $p=0.95$ ; D3:  $t_{17}=0.81$ ,  $p=0.43$ ; Dat:  $t_{17}=0.50$ ,  $p=0.62$ ; Oct3:  $t_{17}=0.76$ ,  $p=0.46$ ; Maob:  $t_{17}=-$   
414  $0.00$ ,  $p=1.00$ ). Data shown as fold-change compared with Dys1AGlast<sup>+/+</sup> control mice. \* $p<0.05$  vs  
415 Dys1AGlast<sup>+/+</sup>. **g.** Flow cytometry gating strategy and surface D2 receptor protein expression quan-  
416 tification in tdTomato-positive (tdT<sup>+</sup>) and negative (tdT<sup>-</sup>) cells from the basal ganglia of  
417 Dys1AGlast<sup>+/+</sup> (n7) and Dys1AGlast<sup>-/-</sup> mice (n7) expressed as mean fluorescence intensity (MFI),  
418 revealing increased astrocytic surface D2 expression in DysGlast<sup>-/-</sup> mice compared to  
419 Dys1AGlast<sup>+/+</sup> only in tdTomato-positive cells (Two-way ANOVA: genotype\*cell-type interaction:  
420  $F_{1,12}=5.71$ ;  $p=0.03$ ). Data shown as fold-change compared with Dys1AGlast<sup>+/+</sup> control mice.  
421 \* $p<0.01$  Dys1AGlast<sup>-/-</sup> tdT<sup>+</sup> vs all other groups. **h.** Schematic of the experiment and localization of  
422 probe dialyzing portion within the GPe. Dys1AGlast<sup>+/+</sup> (n11) and Dys1Glast<sup>-/-</sup> (n9) littermates were  
423 implanted with a dialysis probe for measurement of basal extracellular dopamine levels and  
424 quinpirole-induced dopamine release. Quinpirole infusion (gray area) decreased extracellular dopa-  
425 mine release in the GPe of Dys1AGlast<sup>+/+</sup> mice, but not in Dys1AGlast<sup>-/-</sup> littermates (Two-way RM  
426 ANOVA: genotype\*time interaction,  $F_{8,148}=2,18$ ;  $p<0.05$ ). \*\* $p<0.005$  Dys1AGlast<sup>+/+</sup> quinpirole vs  
427 baseline. **i.** Schematic of the fiber photometry experiment and representative post-hoc localization of  
428 the tip of the optic fiber within GPe (left) and low magnification confocal images of the viral spread  
429 and optic fiber placement (right). Dys1AGlast<sup>+/+</sup> (n4) and Dys1Glast<sup>-/-</sup> (n4) littermates were first  
430 injected with the adeno-associated virus (AAV) to express dLight and successively implanted with  
431 an optic fiber for recording of synaptic release of dopamine using fiber photometry. Quinpirole (0.5  
432 mg/kg, i.p.) decreased dLight signal compared to the 5-min baseline period before injection in the  
433 GPe of Dys1AGlast<sup>+/+</sup> mice, but not in Dys1AGlast<sup>-/-</sup> littermates (Two-way RM ANOVA: geno-  
434 type\*time interaction,  $F_{8,148}=34.32$ ;  $p<0.0005$ ). \* $p<0.05$  Dys1AGlast<sup>+/+</sup> quinpirole vs their baseline.  
435

436 **Dys1A disruption in astrocytes delays reward-expectancy dopamine dynamics in GPe**

437 To directly correlate behavioral functioning with dopamine dynamics within the GPe to, and its mod-  
438 ulation by astrocytic Dys1A, we used the dLight dopamine sensor during progressive ratio testing  
439 (Fig. 6a).

440 Decreased dopamine signal was evident in Dys1AGlast<sup>+/+</sup> immediately after a correct poke, while  
441 this decrease was delayed of 2 seconds in Dys1AGlast<sup>-/-</sup> mice (Fig. 6b). Similarly, a sharp decrease  
442 of dopamine signal was evident in Dys1AGlast<sup>+/+</sup> immediately after entry into the food magazine  
443 (Fig. 6c), regardless of presence of a food pellet (Supplementary Fig. S7). In contrast, Dys1AGlast<sup>-/-</sup>  
444 <sup>-/-</sup> mice showed a more gradual decrease within 3 seconds after magazine entry (Fig. 6c; Supplemen-  
445 tary Fig. S7). No behavioral- or genotype-dependent effects on GPe dopamine dynamics were evident  
446 for incorrect responses (Fig. 6d). No behavioral-dependent variations on tdTomato control signal  
447 were detected (Supplementary Fig. S7).

448 These results indicate that reward expectancy is associated with decreased dopamine signaling in  
449 GPe, and that disruption of Dys1A in astrocytes, which impairs motivation, delays this effect.

450

451 **Dys1A disruption in astrocytes alters reward-related astrocytic responses in GPe**

452 To visualize the involvement of GPe astrocytes in motivational behaviors, and the impact of astro-  
453 cytic Dys1A disruption, we monitored astrocyte population Ca<sup>2+</sup> levels in GPe in Dys1AGlast<sup>+/+</sup> and  
454 Dys1AGlast<sup>-/-</sup> mice while performing the progressive ratio test (Fig. 6e).

455 Analyses of behaviorally linked Ca<sup>2+</sup> signaling revealed that astrocytic responses in GPe of  
456 Dys1AGlast<sup>+/+</sup> mice increased during a correct choice and food magazine entry and decreased start-  
457 ing 3 seconds after these actions (Fig. 6f,g). No significant Ca<sup>2+</sup> modulation was evident for incorrect  
458 responses in GPe of Dys1AGlast<sup>+/+</sup> mice (Fig. 6h). In contrast, Dys1AGlast<sup>-/-</sup> mice showed a strong  
459 decrease of astrocytes Ca<sup>2+</sup> responses in GPe following correct choices and magazine entrance com-  
460 pared with Dys1AGlast<sup>+/+</sup> mice (Fig. 6f,g). Conversely, an increased astrocyte Ca<sup>2+</sup> response in GPe



461 was evident when an incorrect nose poke was made (Fig. 6h). No effects were evident for GPe astro-  
462 cytic  $\text{Ca}^{2+}$  signal when traces were phase-randomized, and for the tdTomato control signal (Supple-  
463 mentary Fig. S7).

464 This demonstrates an aberrant reduction of reward-related astrocytic responses in GPe upon dele-  
465 tion of *Dys1A* in astrocytes. This effect could be related to increased astrocytic D2 in *Dys1AGlast*<sup>-/-</sup>  
466 mice, as D2 stimulation was reported to decrease astrocytes  $\text{Ca}^{2+}$  responses in GPe and midbrain<sup>10,</sup>  
467 <sup>45</sup>.

468

### 469 **Dys1A disruption in astrocytes switches reward-related dopamine-astrocytic communication**

470 In an attempt to relate *in vivo* dopamine with astrocytic dynamics, we quantified reward-related cor-  
471 relations (Pearson's correlation coefficient, PCC), and timescale cross-correlation between GPe as-  
472 trocytic activity and GPe dopamine dynamics.

473 In *Dys1AGlast*<sup>+/+</sup>, astrocytes responses in GPe were anti-correlated to GPe dopamine with a lag  
474 of 2-3 sec, suggesting that astrocytes responses preceded dopamine fluctuations (Fig. 6i). This is in  
475 line with the idea of astrocytes contributing to the inhibition of dopamine release<sup>10, 44</sup>. Conversely,  
476 *Dys1AGlast*<sup>-/-</sup> show a strikingly high positive correlation paired with a precise synchrony (lag=0.1-  
477 0.0sec) between astrocyte activity and dopamine dynamic (Fig. 6j). This strengthens the evidence of  
478 an impaired astrocytic inhibitory control over dopamine release following *Dys1A* disruption in astro-  
479 cytes, which could then result in a delayed reward-related dopamine decrease.

480 These data support the conclusion that *Dys1A* disruption in astrocytes reverts reward-related as-  
481 trocyte-to-dopamine communication in GPe.

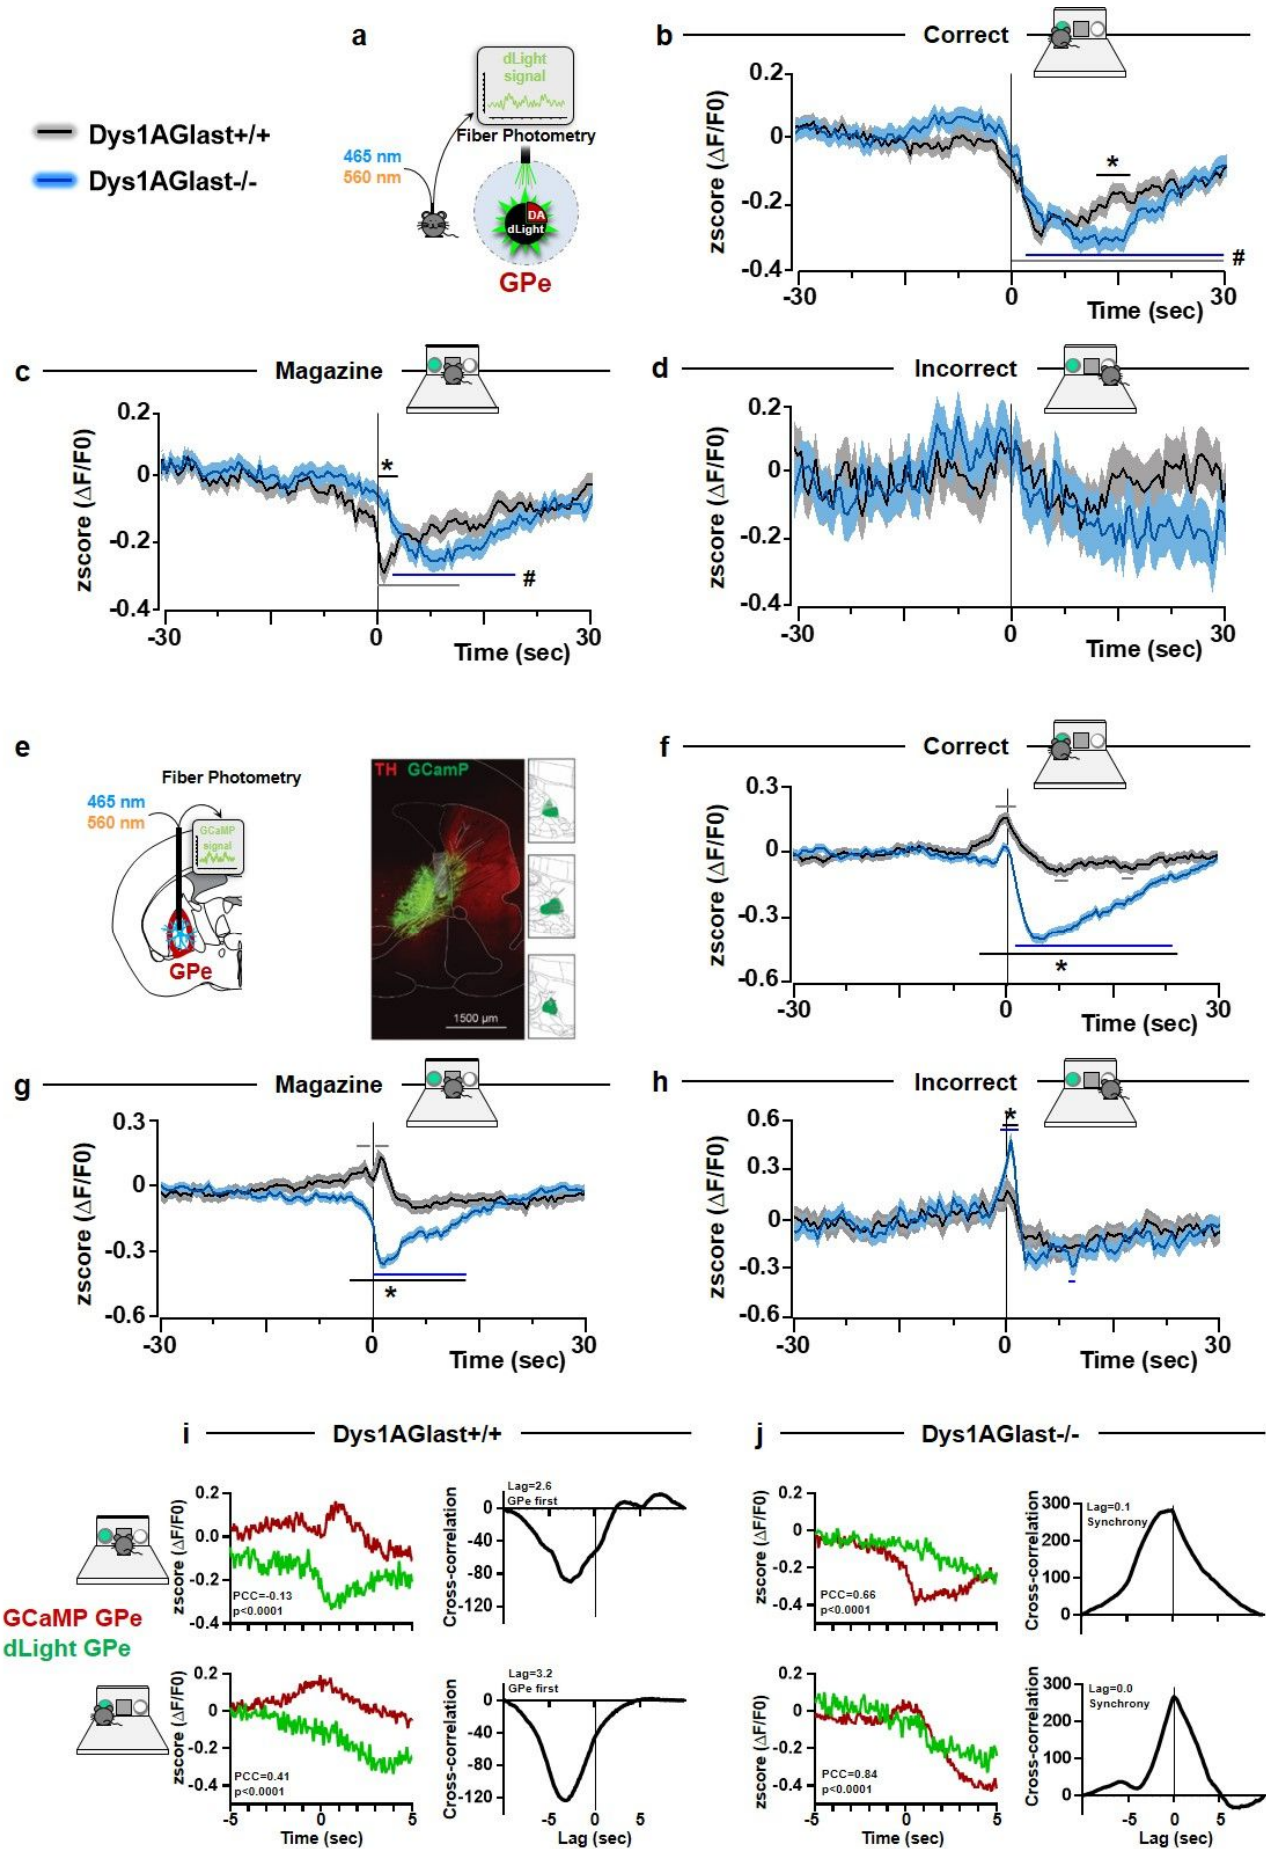

483 **Figure 6. Dys1A disruption in astrocytes alters astrocytes-dopamine communication related to**  
484 **reward-expectancy in GPe. a.** Schematic of the fiber photometry experiment performed in  
485 Dys1AGlast<sup>+/+</sup> (n4) and Dys1Glast<sup>-/-</sup> (n4) littermates injected with the AAV to express dLight and  
486 successively implanted with an optic fiber for recording of synaptic release of dopamine in the GPe  
487 during the progressive ratio test. **b.** Analyses of the dLight signal during responses to correct nose  
488 pokes (Correct) revealed a  $\Delta F/F_0$  decrease compared to baseline values in the GPe of both  
489 Dys1AGlast<sup>+/+</sup> (from 0 to 29 sec after a correct poke) and Dys1AGlast<sup>-/-</sup> mice (from 2 to 30 sec  
490 after a correct poke), and decreased values in Dys1AGlast<sup>-/-</sup> compared to Dys1AGlast<sup>+/+</sup> from 13 to  
491 17 seconds after a correct poke (Two-way RM ANOVA, genotype-by-time interaction:  
492  $F_{120,253080}=4.41$ ;  $p<0.0001$ ). # $p<0.05$  vs own genotype baseline. \* $p<0.05$  vs Dys1AGlast<sup>+/+</sup> at the  
493 same time interval. **c.** Analyses of the dLight signal in the GPe during food magazine entrance re-  
494 vealed a decreased ( $\Delta F/F_0$ ) signal in Dys1AGlast<sup>+/+</sup> from the entrance to the magazine up to 10 sec  
495 later, and from 3 sec up to 21 in Dys1AGlast<sup>-/-</sup> mice. # $p<0.05$  vs own genotype baseline. Moreover,  
496 compared to Dys1AGlast<sup>+/+</sup> littermates, Dys1AGlast<sup>-/-</sup> mice had higher dLight signal from 0 to 2  
497 sec following magazine entrance \* $p<0.05$  vs Dys1AGlast<sup>+/+</sup> at the same time interval. (Two-way  
498 RM ANOVA, genotype-by-time interaction:  $F_{120,249240}=4.61$ ;  $p<0.0001$ ). **d.** Analyses of the dLight  
499 signal in the GPe during incorrect nose pokes (Incorrect) revealed no  $\Delta F/F_0$  changes compared to  
500 baseline values of both Dys1AGlast<sup>+/+</sup> and Dys1AGlast<sup>-/-</sup> mice nor genotype-dependent effects  
501 (Two-way RM ANOVA, genotype-by-time interaction:  $F_{120,35400}=1.96$ ;  $p<0.0001$ ). **e.** Experimental  
502 design to monitor astrocytes  $Ca^{2+}$  levels in GPe using a fiber-photometry system in freely behaving  
503 Dys1AGlast<sup>+/+</sup> (n6) and Dys1AGlast<sup>-/-</sup> (n5) during the progressive ratio test. Reconstruction of viral  
504 expression and location of viral injection sites. Placements and representative images of viral expres-  
505 sion (GCaMP) and staining for dopaminergic neurons (TH) in the GPe and SNc/VTA in the same  
506 mouse. **f.** Astrocytes responses to correct nose pokes (Correct) revealed in Dys1AGlast<sup>+/+</sup> mice an  
507 increased  $\Delta F/F_0$  signal from 1 sec before up to 2 sec following the entrance into the correct poke, and  
508 decreased signal from 6.5 to 10 sec and from 17 to 19 sec after the correct poke. In Dys1AGlast<sup>-/-</sup>  
509 mice, decreased  $\Delta F/F_0$   $Ca^{2+}$  signal was evident from 2 up to 25 sec following entrance into the correct  
510 poke. (Two-way RM ANOVA, genotype-by-time interaction:  $F_{120,671880}=42.89$ ;  $p<0.0001$ ). \* $p<0.05$   
511 gray line: Dys1AGlast<sup>+/+</sup> vs their own baseline; blue line: Dys1AGlast<sup>-/-</sup> vs their own baseline; black  
512 line: Dys1AGlast<sup>-/-</sup> vs Dys1AGlast<sup>+/+</sup> at the same time interval. **g.** Astrocytes responses to magazine  
513 entrance (Magazine) revealed in Dys1AGlast<sup>+/+</sup> mice an increased  $\Delta F/F_0$  signal from 2.5 to 1 sec  
514 before and from 1 to 3 sec after magazine entrance. In Dys1AGlast<sup>-/-</sup> mice, decreased  $\Delta F/F_0$   $Ca^{2+}$   
515 signal was evident from 0 up to 14 sec following entrance into the magazine (Two-way RM ANOVA,  
516 genotype-by-time interaction:  $F_{120,460440}=21.44$ ;  $p<0.0001$ ). \* $p<0.05$  gray line: Dys1AGlast<sup>+/+</sup> vs  
517 their own baseline; blue line: Dys1AGlast<sup>-/-</sup> vs their own baseline; black line: Dys1AGlast<sup>-/-</sup> vs  
518 Dys1AGlast<sup>+/+</sup> at the same time interval. **h.** Astrocytes responses to incorrect nose pokes (Incorrect)  
519 revealed no effects in Dys1AGlast<sup>+/+</sup> mice. In Dys1AGlast<sup>-/-</sup> mice, increased  $\Delta F/F_0$   $Ca^{2+}$  signal was  
520 evident from -1 to 1 sec following entrance into the incorrect choice, and a decrease from 9 to 10 sec  
521 after (Two-way RM ANOVA, genotype-by-time interaction:  $F_{120,73560}=1.75$ ;  $p<0.0001$ ). \* $p<0.05$   
522 gray line: Dys1AGlast<sup>+/+</sup> vs their own baseline; blue line: Dys1AGlast<sup>-/-</sup> vs their own baseline; black  
523 line: Dys1AGlast<sup>-/-</sup> vs Dys1AGlast<sup>+/+</sup> at the same time interval. **i.** Correlation of overall activity  
524 (left) and cross-correlation (right) in Dys1AGlast<sup>+/+</sup> mice between the GCaMP signal in GPe and  
525 dLight in GPe, referred to 5 sec before and 5 sec after magazine (upper) and correct entry (lower). **j.**  
526 Correlation of overall activity (left) and cross-correlation (right) in Dys1AGlast<sup>-/-</sup> mice between the  
527 GCaMP signal in GPe and dLight in GPe, referred to 5 sec before and 5 sec after magazine (upper)  
528 and correct entry (lower).  
529

530 **D2 disruption in GPe astrocytes increases motivation and GPe dopamine levels**

531 To test if D2 receptors in astrocytes are responsible for astrocytic Dys1A modulation of basal ganglia  
532 behavioral and dopaminergic processes, we selectively deleted D2 receptors in GPe astrocytes  
533 (GFAP-D2-GP<sup>-/-</sup>; Fig. 7a).

534 Opposite to astrocytic Dys1A disruption (Fig. 4), D2 disruption in GPe astrocytes increased sen-  
535 sorimotor gating abilities (Fig. 7b), while not affecting startle reactivity or body weight (Supplemen-  
536 tary Fig. S8). Opposite to astrocytic Dys1A disruption (Fig. 4), GFAP-D2-GP<sup>-/-</sup> mice showed in-  
537 creased motivation to work for a reward compared to GFAP-D2-GP<sup>+/+</sup> (Fig. 7c), while no GFAP-  
538 D2-GP genotype effects were evident in the acquisition of the basic operant task (Supplementary Fig.  
539 S8). No differences were evident between GFAP-D2-GP<sup>-/-</sup> and GFAP-D2-GP<sup>+/+</sup> in exploratory ac-  
540 tivity (Supplementary Fig. S8). Finally, opposite to astrocytic Dys1A disruption (Fig. 5), GFAP-D2-  
541 GP<sup>-/-</sup> mice showed increased dopamine levels in GPe (Fig. 7d). No differences between GFAP-D2-  
542 GP<sup>-/-</sup> and GFAP-D2-GP<sup>+/+</sup> mice were evident in levels of DOPAC or HVA (Supplementary Fig.  
543 S8).

544 Overall, these results demonstrate a direct link between GPe astrocytic D2 levels, GPe dopamine  
545 levels, sensorimotor gating and motivational processes. In particular, increased D2 in astrocytes in  
546 the basal ganglia is associated with impaired PPI, reduced motivation and reduced dopamine levels  
547 in GPe. Conversely, decreased astrocytic D2 in GPe increased PPI, motivation, and GPe dopamine  
548 levels.

549

550 **D2 disruption in SNc/VTA astrocytes increases motivation and GPe dopamine levels**

551 Dopamine in GPe is released by midbrain dopaminergic neurons<sup>46,47</sup>, whose activity can be modu-  
552 lated by astrocytes<sup>48</sup>. As in STR/GPe (Fig. 5), Dys1A disruption in astrocytes increased D2 astrocytic  
553 expression also in the midbrain (Supplementary Fig. S8). Thus, we finally tested if midbrain astro-  
554 cytic D2 signaling can also influence basal ganglia-dependent behavioral and dopaminergic pheno-  
555 types.

556 We deleted D2 receptors in astrocytes within the substantia nigra pars compacta (SNc) and ventral  
557 tegmental area (VTA) regions (GFAP-D2-SN/VTA<sup>-/-</sup>; Fig. 7e). GFAP expression was more pro-  
558 nounced in SNc compared to VTA (Fig. 7f). This might result in a bias towards greater D2 deletion  
559 in astrocytes within SNc, the major source of dopaminergic projections to GPe<sup>46,47</sup>. Notably, opposite  
560 to astrocytic Dys1A disruption, and similar to astrocytic D2 disruption in GPe, GFAP-D2-SN/VTA-  
561 <sup>-/-</sup> mice showed increased dopamine and DOPAC levels in GPe (Fig. 7g,h). No difference between  
562 these two groups was evident in HVA levels (Supplementary Fig. S8). Opposite to astrocytic Dys1A  
563 disruption, and similar to astrocytic D2 disruption in GPe, GFAP-D2-SN/VTA<sup>-/-</sup> mice showed in-  
564 creased motivation to work for a reward compared to GFAP-D2-SN/VTA<sup>+/+</sup> (Fig. 7i). No genotype  
565 effects were evident in acquisition of the operant task (Supplementary Fig. S8). No genotype differ-  
566 ences were evident in exploratory activity and body weight (Supplementary Fig. S8). These results  
567 demonstrate a direct link between SNc/VTA astrocytic D2, dopamine levels within the GPe, and  
568 motivational behavior.

569 Overall, these data clarify that astrocytic D2 receptors can cause behavioral and basal ganglia do-  
570 pamine alterations by a local effect on GPe and through the modulation of dopaminergic transmission  
571 from the SNc/VTA.

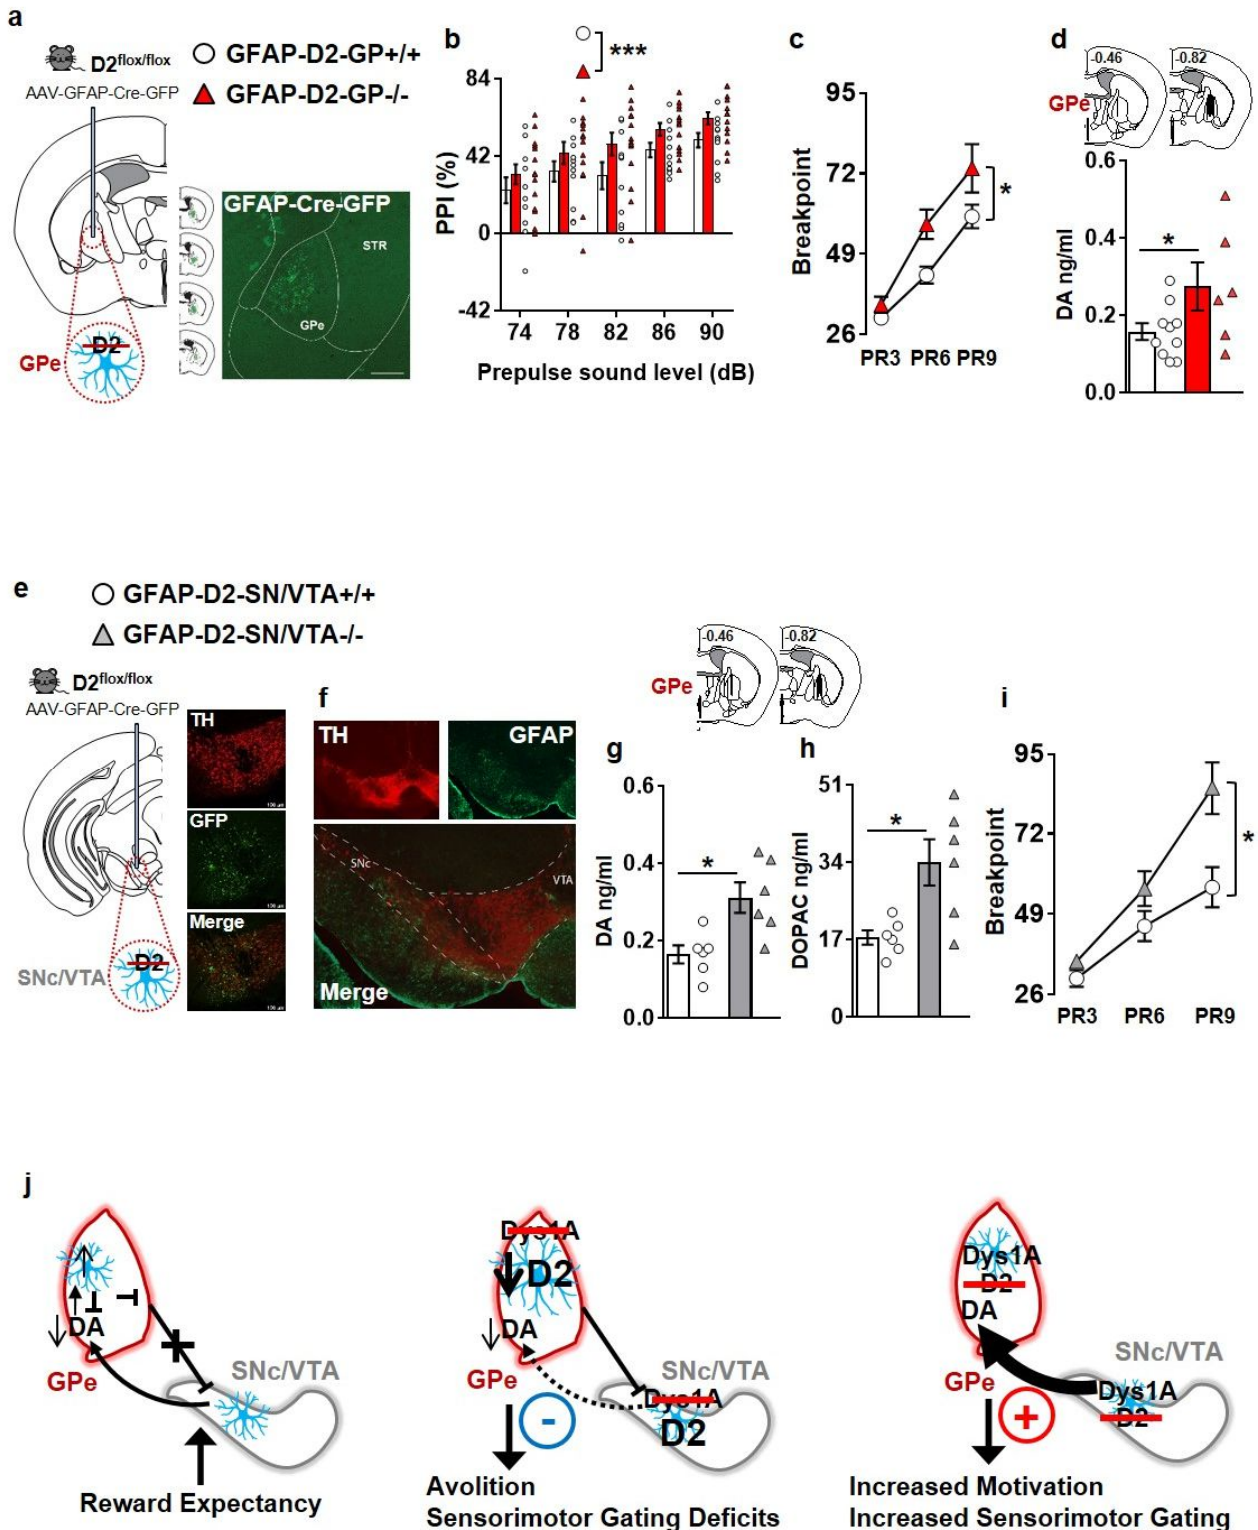

572

573

574 **Figure 7. D2 disruption in astrocytes in GPe or SNc/VTA increased PPI, motivation and dopa-**  
 575 **mine outflow within the GPe. a.** Experimental design to selectively delete dopamine D2 receptors  
 576 of  $D2^{flox/flox}$  mice restricted to GPe-astrocyte, bilaterally. Reconstruction of viral spread across the  
 577 GPe along anteroposterior axis. Low magnification images of a representative viral spread on a cor-  
 578 onal slices of a  $D2^{flox/flox}$  mice injected with AAV-GFAP-Cre-GFP (scale bar=500 $\mu$ m). Findings were

579 replicated in two independent experiments with similar results. **b.** Percentage PPI of the 120dB acoustic  
580 startle response displayed by control mice bilaterally injected in the GP with the AAV-GFAP-Cre-  
581 GFP (GFAP-D2-GP<sup>+/+</sup>, n12), and D2<sup>flox/flox</sup> littermates bilaterally injected in the GPe with the AAV-  
582 GFAP-Cre-GFP (GFAP-D2-GP<sup>-/-</sup>, n14). GFAP-D2-GP<sup>-/-</sup> have increased PPI compared to GFAP-  
583 D2-GP<sup>+/+</sup> mice (Two-way repeated measure ANOVA; genotype effect:  $F_{1,25}=4.70$   $p=0.040$ ).  
584 \* $p<0.05$  vs GFAP-D2-GP<sup>+/+</sup>. **c.** Breakpoint during a food-driven operant behavior test with increas-  
585 ing progressive ratio (PR) displayed by GFAP-D2-GP<sup>+/+</sup> (n12), and GFAP-D2-GP<sup>-/-</sup> (n12) litterma-  
586 tes. GFAP-D2-GP<sup>-/-</sup> mice showed higher breakpoints than GFAP-D2-GP<sup>+/+</sup> mice (Two-way re-  
587 peated measure ANOVA; genotype effect:  $F_{1,22}=5.78$ ;  $p=0.025$ ). \* $p<0.05$  vs GFAP-D2-GP<sup>+/+</sup>. **d.**  
588 GFAP-D2-GP<sup>+/+</sup> (n11) and GFAP-D2-GP<sup>-/-</sup> (n8) littermates were implanted with a dialysis probe  
589 for measurement of basal extracellular dopamine levels. Top panel show the localization of probe  
590 dialyzing portion within the GPe. Three mice were excluded for misplaced probe. GFAP-D2-GP<sup>-/-</sup>  
591 show higher extracellular dopamine levels compared to GFAP-D2-GP<sup>+/+</sup> mice (t-test:  $t_{14}=-2.13$ ,  
592  $p=0.05$ ). \* $p<0.05$  vs GFAP-D2-GP<sup>+/+</sup>. **e.** Experimental design to selectively delete dopamine D2  
593 receptors in the astrocytes of adult D2<sup>flox/flox</sup> mice only within SNc/VTA, bilaterally. Example images  
594 of SNc/VTA stained for tyrosine hydroxylase (TH, to visualize the dopaminergic neurons) and for  
595 GFP (to identify the cells infected by the virus). **f.** Distribution of GFAP-positive astrocyte in the  
596 VTA/SN section co-stained for TH as a maker for the dopaminergic neurons. **g-h.** GFAP-D2-  
597 VTA/SN<sup>+/+</sup> (n6) and GFAP-D2-SN/VTA<sup>-/-</sup> (n6) littermates were implanted with a dialysis probe  
598 for measurement of basal extracellular dopamine levels in the GPe (top figure shows the localization  
599 of probes dialyzing portion within the GPe). GFAP-D2-SN/VTA<sup>-/-</sup> showed increased basal extracel-  
600 lular **g.** dopamine (t-test:  $t_{10}=-3.20$ ,  $p=0.009$ ), and **h.** DOPAC levels (t-test:  $t_{10}=-3.10$ ,  $p=0.011$ ) than  
601 GFAP-D2-SN/VTA<sup>+/+</sup> littermates. \* $p<0.05$  vs GFAP-D2-SN/VTA<sup>+/+</sup>. **i.** Breakpoint during a food-  
602 driven operant behavior test with increasing progressive ratio (PR) displayed by GFAP-D2-  
603 SN/VTA<sup>+/+</sup> (n10), and GFAP-D2-SN/VTA<sup>-/-</sup> (n14) littermates. GFAP-D2-SN/VTA<sup>-/-</sup> mice showed  
604 higher breakpoints than GFAP-D2-SN/VTA<sup>+/+</sup> mice (Two-way repeated measure ANOVA; geno-  
605 type effect:  $F_{1,22}=5.28$ ;  $p=0.031$ ). \* $p<0.05$  vs GFAP-D2-SN/VTA<sup>+/+</sup>. **j.** Schematic figure model de-  
606 picting astrocytes-dependent Dys1A/D2 signaling pathways involved in basal ganglia dopamine-re-  
607 lated modulation of motivational and sensorimotor gating abilities.  
608

## 609 Discussion

610 In this study, we reveal Dys1A as a molecule participating in astrocytic modulation of behavioral and  
611 dopaminergic/D2 pathways within the basal ganglia, with implications for schizophrenia. Notably,  
612 the Dys1A isoform which is reduced in the caudate of patients with schizophrenia, is the only Dys1  
613 isoform expressed by astrocytes. Disruption of Dys1A in astrocytes is sufficient to alter dopamine/D2  
614 dynamics within basal ganglia and, accordingly, induce basal ganglia-dependent reward and sen-  
615 sorimotor gating deficits. Finally, we demonstrate that these behavioral and dopaminergic alterations  
616 depend on astrocytic D2 receptors levels within GPe and SNc/VTA regions (Fig. 7j).

617 Dys1A affected basal ganglia dopaminergic and behavioral functions, while sparing these pro-  
618 cesses within the cortex. The differential control by astrocytic Dys1A of dopamine-related behaviors  
619 between cortical and basal ganglia regions adds to increasing evidence for heterogeneous astrocyte-  
620 mediated processes across different brain regions<sup>12-14</sup>. In contrast to Dys1A, the expression of Dys1C  
621 increases during cortical development, and is selectively reduced in PFC of patients with schizophre-  
622 nia<sup>17</sup>. This suggests that Dys1-dependent dopaminergic and behavioral alterations at the cortical level  
623<sup>20, 22, 26, 49</sup> might be more related to neuronal Dys1C. Most importantly, our findings uncovers a novel  
624 astrocytic mechanism as a player in the dopaminergic cortical/basal ganglia dichotomy and related  
625 behavioral abnormalities consistently reported in schizophrenia<sup>50, 51</sup>.

626 We reveal that the interaction between astrocytes and dopamine system at the level of basal ganglia  
627 has major effects on motivated behavior and saliency detection. In particular, Dys1A reduction in  
628 astrocytes increased levels of astrocytic D2 receptors in basal ganglia, and resulted in avolition and  
629 sensorimotor gating deficits. Similarly, striatal overexpression of D2 receptors by the CamKII pro-  
630 moter<sup>52</sup>, which is also present in astrocytes<sup>53</sup>, reduced motivation<sup>38</sup>. Conversely, D2 reduction in  
631 astrocytes in either GPe or SNc/VTA, resulted in increased motivation and sensorimotor gating abil-  
632 ities. In contrast, both astrocytic manipulations of Dys1A and D2 spared gross motor functions, de-  
633 spite altering dopamine signaling within GPe. Historically, the GPe has been implicated in movement  
634 control<sup>54</sup>. However, in agreement with our findings, recent studies are showing GPe involvement in



635 motivational and sensorimotor gating abilities<sup>55-58</sup>. Moreover, in agreement with our findings, dopa-  
636 minergic manipulations within GPe may not alter motor functions<sup>55, 58, 59</sup>, and D2 receptors do not  
637 contribute to amphetamine-evoked astrocytic and locomotor responses<sup>5</sup>. In contrast, astrocyte-dopa-  
638 mine interactions within VTA-NAcc dopamine/D1 pathways are involved in locomotor processes<sup>5</sup>.  
639 Thus, we here extend previous findings by showing that astrocytes regulate motivational and sen-  
640 sorimotor gating processes by dopamine/D2-dependent mechanisms involving SNc/VTA to  
641 STR/GPe pathways. Overall, astrocytic Dys1A and D2 receptors could be cell-specific targets for the  
642 treatment of motivational and other neuropsychiatric disorders associated with disrupted dopa-  
643 mine/D2 signaling.

644 In agreement with increasing evidence<sup>3, 5, 9, 10, 44</sup>, our findings strengthen the direct implication of  
645 astrocytes as modulators of dopaminergic signaling. In particular, we demonstrate a previously un-  
646 known contribution of Dys1A in the astrocytic machinery controlling dopamine/D2 levels and func-  
647 tions, especially within GPe. Dopamine in GPe is mainly released through volume transmission<sup>47</sup>,  
648 which may better relate to astrocytic activity<sup>44, 60</sup>. Conditions of reduced dopamine in GPe and STR  
649 are associated with increased astrocytic activity and augmented astrocyte-related GABA inhibition  
650 of dopamine release<sup>10, 44</sup>. In agreement, in physiological conditions (wild-type mice, Fig. 7j), reward  
651 expectancy-related decrease of dopamine levels in GPe preceded and was anti-correlated to increased  
652 astrocytes activation in GPe. Reduction of dopamine in GPe increases GABA tone through astrocytic  
653 D2-dependent mechanisms, resulting in inhibition of GPe neurons<sup>61</sup>. This might re-establish the ac-  
654 tivity of SNc/VTA dopamine neurons, which are monosynaptically inhibited by GPe projecting neu-  
655 rons<sup>62</sup>. Dopamine levels in basal ganglia are more closely related to motivational behavior than cell  
656 spiking of dopaminergic neurons in SNc/VTA<sup>63</sup>. Nevertheless, astrocytes in SNc/VTA can also mod-  
657 ulate the excitatory states of dopamine neurons<sup>48</sup>, and the SNc, which is the primary source of dopa-  
658 mine in GPe, displays increased susceptibility to astrocytic D2 manipulations compared to VTA<sup>9</sup>. In  
659 agreement, we demonstrated that deletion of astrocytic D2 either in GPe or SNc/VTA increased mo-

660 tivational behavior and increased dopamine levels in GPe. Thus, our findings well fit in this astro-  
661 cytic-dopaminergic SNc-GPe homeostatic loop. Notably, in pathological conditions of astrocytic D2  
662 overexpression (Dys1AGlast<sup>-/-</sup>, Fig. 7j), the motivation-related abnormal reduction of astrocytes ac-  
663 tivity in GPe would prevent the inhibition of local dopamine release and prevent the inhibition of GPe  
664 inhibitory projecting neurons. The loss of disinhibition of SNc/VTA dopamine neurons would pro-  
665 long and delay dopamine dynamics in GPe, thereby leading to reduced motivated behavior (all of  
666 which was observed in our mice). Overall, our results extend previous evidence<sup>5, 10, 44</sup> by demonstrat-  
667 ing that astrocytes are involved in the maintenance of motivational states and related ambient dopa-  
668 minergic functionality in basal ganglia.

669 Increased astrocytic D2 in Dys1AGlast knockout mice was associated with loss of D2-dependent  
670 and delayed reward expectancy control of dopamine outflow. In contrast, neuronal overexpression of  
671 D2 enhances D2-dependent dopaminergic and behavioral responses<sup>64</sup>. Moreover, we found that as-  
672 trocytic D2 disruption increased basal ganglia dopamine outflow. In contrast, neuronal D2 disruption  
673 decreases striatal dopamine outflow<sup>65, 66</sup>. Finally, in net contrast to astrocytic Dys1A deletion (our  
674 data), selective disruption of Dys1 in SNc/VTA dopaminergic neurons<sup>67</sup> resulted in altered locomo-  
675 tion, altered amphetamine-dependent dopamine release, and unaltered PPI. Thus, our findings reveal  
676 distinct astrocytic- *versus* neuronal-mediated control of dopamine signaling, at least within basal gan-  
677 glia circuits.

678 In summary, we uncovered a selective, pivotal role for astrocytic Dys1A/D2 in the modulation of  
679 dopamine pathways within basal ganglia with direct implication for motivational and sensorimotor  
680 gating abilities relevant to schizophrenia. These findings provide a deeper mechanistic understanding  
681 of astrocytic regulation of dopamine signaling and its potential involvement in behavioral dysfunc-  
682 tions in psychiatric disorders. Indeed, our findings are of both fundamental and clinical relevance as  
683 they refine the concept of dopamine dysfunction in behavioral disorders and point to basal ganglia  
684 astrocytes as a promising target.

685 **Acknowledgments**

686 We thank M. Morini, E. Albanesi, D. Cantatore, G. Pruzzo, T. Catelani, D. Mauro, S. Monari, F.  
687 Torri, B. Chiarenza, A. Monteforte and C. Chiabrera, for technical support. We thank Glax-  
688 oSmithKline and Dr. S. Wilson for generously donating the newly generated Dys1Aflox mice. We  
689 thank Dr. D.R. Weinberger and Dr. R.E. Straub for initial access to the Brain Cloud databank. We  
690 thank Dr. L. Tian and Dr. T. Patriarchi for generously sharing the initial dLight virus samples. This  
691 work was supported by funding from the Marie Skłodowska-Curie Fellowships (grant n.796244) to  
692 CD; the Ministero dell'Università e della Ricerca italiano (project PRIN 2017K2NEF4) to FD; the  
693 Istituto Italiano di Tecnologia, the Brain and Behavior Research Foundation (2015 NARSAD grant  
694 n.23234), the Ministero della Salute italiano (project GR-2016-02362413), and Fondazione Telethon  
695 Italia (project GGP19103) to FP.

696

697 **Author Contributions**

698 Conceptualization, RM, GT, FM and FP; Methodology and Investigation, RM, GT, DD, CD, VF,  
699 GO, RM, FM, GP, AF, MADL, FM and FP; Resources, GO, DR, JLW, GML, CSW, FM and FP;  
700 Writing, all authors; Visualization, RM, GT, DD, CD, GL, GO, RM, FM and FP; Supervision, FM  
701 and FP; Funding Acquisition, FD, CSW, and FP.

702

703 **Competing Interests statement**

704 The authors declare no competing interests.

705

706 **Online Methods**

707

708 **Mice**

709 All procedures were approved by the Italian Ministry of Health (permit n. 230/2009-B, 107/2015-PR,  
710 and 749/2017-PR) and local Animal Use Committee and were conducted in accordance with the  
711 Guide for the Care and Use of Laboratory Animals of the National Institutes of Health and the Euro-  
712 pean Community Council Directives. Routine veterinary care and animal maintenance were provided  
713 by dedicated and trained personnel. Male and female littermate mice between 3-7 months of age were  
714 used throughout. Animals were housed 2-4 per cage, in a climate-controlled animal facility ( $22^{\circ}\text{C} \pm$   
715  $2^{\circ}\text{C}$ ) and maintained on a 12-hr light/dark cycle (08:00 on; 20:00 off), with food and water available  
716 *ad libitum*. The experimenter handled the mice on alternate days during the week preceding the tests.  
717 Body weights and general appearance of mice were recorded before starting behavioral testing.

718 ***Dys1, Dys1A, Dys1AGlast and D2 mutant mice.*** The *Dys1* heterozygous mutant mice (*Dys1*<sup>+/-</sup>) and  
719 their wild-type littermates (*Dys1*<sup>+/+</sup>) with a C57BL6/J background were bred and used as previously  
720 described<sup>20, 26</sup>. The *Dys1A*<sub>flox/flox</sub> mice generated by Glaxo SmithKline<sup>27</sup> were kept on C57BL6/J  
721 background and presented two loxP sites flanking exon 5, which is necessary for correct expression  
722 of the *Dys1A* long isoform. Constitutive *Dys1A* deletion (*Dys1A*<sup>-/-</sup>) or partial reduction (*Dys1A*<sup>+/-</sup>)  
723 was obtained crossing *Dys1A*<sub>flox/flox</sub> mice with a germline Cre deleter transgenic strain (Taconic-Ar-  
724 temis Germany). The breeding scheme used consisted of mating one male *Dys1A*<sup>+/-</sup> with two  
725 *Dys1A*<sup>+/-</sup> females. Astrocyte-specific loss (*Dys1AGlast*<sup>-/-</sup>) or partial reduction (*Dys1AGlast*<sup>+/-</sup>) of  
726 the expression of *Dys1A* was obtained by mating *Dys1A*<sub>flox/flox</sub> mice with the inducible Cre transgenic  
727 line *Glast-CreERt2* (Mori et al. 2006). The resulting strain was then crossed with the reporter line  
728 *stop*<sub>flox/flox</sub> *tdTomato* (Jackson Laboratory). Tamoxifen (T-5648, Sigma-Aldrich, St. Louis, MO,  
729 USA) was dissolved in corn oil (Sigma-Aldrich, C-8267) and 1:20 ethanol at 55°C for two hours to  
730 prepare a stock solution at 100mg/ml. Stock solutions were aliquoted and stored at -20°C. To induce

731 Cre-mediated recombination, mice aged 60 days were administered tamoxifen 5mg/day for two con-  
732 secutive days by oral gavage (Mori et al. 2006). Testing started 30 days later. The breeding scheme  
733 consisted of mating one  $DyslA_{flox/+}$   $Glast-CreERT2_{tg/tg}$   $tdTomato_{flox/flox}$  male mouse with two  
734  $DyslA_{flox/+}$   $Glast-CreERT2_{+/+}$   $tdTomato_{flox/flox}$  female mice. Genotyping was performed by PCR using  
735 wild-type, targeted and Cre allele-specific primers (Tab.1).  $Drd2^{loxP/loxP}$  mice were purchased from  
736 Jackson Laboratory (stock #020631)<sup>68</sup>, and the colony was maintained in homozygosity. All mutant  
737 mice used were viable, fertile, normal in size and did not display any gross physical or behavioral  
738 abnormalities.

739

## 740 **Behavior**

741 ***Locomotor Activity.*** Mice were tested in an experimental apparatus consisting of four gray, opaque  
742 open field boxes (40x40x40 cm) evenly illuminated by overhead lighting (5±1 lux). Each session was  
743 video-recorded using an overhead camera from ANY-maze (Stoelting Co., Wood Dale, IL, USA)  
744 with the experimenter absent from the room during the test. Activity was tracked during the first  
745 exposure to the empty open field arena for 30 minutes. For amphetamine experiments, mice were  
746 tested in the same open field arenas. First, mice were placed in the empty open field and allowed to  
747 explore for 10 minutes. Then, mice were removed from the arena, injected with 1.5 mg/kg/10ml D-  
748 amphetamine sulphate (i.p.; Sigma-Aldrich) and placed back in the open field for an additional 60  
749 minutes. This procedure was repeated for five consecutive days. All sessions were videotaped and  
750 tracked with ANY-maze software (Stoelting Co.).

751 ***Male-Female social interaction.*** The test was conducted in Tecniplast cages (35x23x19 cm) illumi-  
752 nated (5±1 lux) and video-recorded using a Unibrain Fire-i digital camera. The video camera was  
753 mounted facing the front of the cage to record the session for subsequent scoring of social investiga-  
754 tion parameters as previously described<sup>69</sup>. Unfamiliar female stimulus mice in estrus were matched  
755 to the subject male mice by age and maintained in social groups of four per home cage.

756 ***Social habituation/dishabituation task.*** Naive mice were tested in Tecniplast cages (35x23x19 cm)  
757 illuminated ( $5\pm 1$  lux) and video-recorded using a Unibrain Fire-i digital camera. As described previ-  
758 ously<sup>69</sup>, mice were placed individually for environmental habituation to the test cage 1h prior to  
759 testing. A stimulus mouse (unfamiliar of the same sex) was introduced into the testing cage for a 1-  
760 min interaction. At the end of the 1-min trial, we removed the stimulus animal and returned it to an  
761 individual holding cage for 3 minutes. We repeated this sequence for three trials with 3-min inter-  
762 trial intervals. In a fifth ‘dishabituation’ trial, we introduced a new (unfamiliar) stimulus mouse into  
763 the testing cage. Videos of behaviors were recorded and subsequently scored offline.

764 ***Attentional Set-Shifting Task.*** Attentional set-shifting was tested in the two-chamber ID/ED Operon  
765 task as previously described<sup>20, 32</sup>. After random selection of mice for the ID/ED task, all behavioral  
766 parameters were obtained blind to the genotype of the animals. For habituation to the apparatus, dur-  
767 ing the first 2 days, mice were habituated for 45 min to the apparatus with only neutral stimuli (Ha-  
768 bituation 1) and trained to move from one chamber to the other (Habituation 2). Any nose poke into  
769 the nose-poke holes resulted in a pellet delivery into the food receptacle. The next day, mice were  
770 trained to perform two randomly presented simple discriminations (e.g. between smooth vs. sand  
771 cardboard; light on vs. light off; peach vs. sage) so that they were familiar with the stimulus dimen-  
772 sions (Habituation 3). These exemplars were not used again. The mice had to reach a criterion of  
773 eight correct choices out of ten consecutive trials to complete this and each following testing stage.  
774 Performance was measured in all phases of all experiments using number of trials to reach the crite-  
775 rion; time (in minutes) to reach the criterion and time (in seconds) from breaking the photobeams  
776 adjacent to the automated door to a nose-poke response (latency to respond). A session started when  
777 a mouse was placed in one of the two chambers where all the stimuli were neutral. Then the transpar-  
778 ent door was dropped to give the mouse access to the other chamber where the stimuli cues were on.  
779 The series of stages comprised a simple discrimination (SD), compound discrimination (CD), com-  
780 pound discrimination reversal (CDRe), IDS, IDS reversal (IDSRe), a second IDS (IDS2), IDS2 re-  
781 versal (IDS2Re), EDS, and EDS reversal (EDSRe). The mice were exposed to the tasks in this order

782 so that they could develop a set, or bias, toward discriminating between the correct and incorrect nose  
783 poke hole.

784 ***Acoustic startle response and prepulse inhibition (PPI).*** Acoustic startle response and PPI were  
785 measured using SR-Lab Systems (San Diego Instruments, San Diego, CA, USA) and TSE Startle  
786 Response System (TSE Systems GmbH, Bad Homburg, Germany) following previously described  
787 protocols<sup>26, 70</sup>. Briefly, a sudden acoustic stimulus (120 dB) elicits the startle response, while an  
788 acoustic, non-startling pre-pulse (74; 78; 82; 86; 90 dB) preceding the startle stimulus inhibits the  
789 startle response (PPI). The startle response elicited by sudden sensory stimuli and its PPI are among  
790 some of the most widely studied phenotypes that are highly conserved across mammalian species. A  
791 background level of 70 dB white noise was maintained throughout the test session.

792 ***Progressive Ratio Test.*** We tested mice in a motivational nose-poke operant paradigm for 14 mg 5-  
793 TUL pellets (Test Diet) as described previously<sup>41</sup>. To avoid confounding factors linked to food re-  
794 striction/deprivation experience, mice were always provided with food and water *ad libitum*. The  
795 operant chambers used (MED Associates Inc, VT, USA) were equipped with two nose-poke holes  
796 mounted at the left and right of a central food magazine, each equipped with infrared photobeams  
797 connected to a computer with MED-PC V software. Nose poking into one of the two holes resulted  
798 in pellet delivery (active hole), whereas nose poking into the other hole (inactive hole) triggered the  
799 house light for 5 seconds (left and right randomly assigned and balanced between groups). Free water  
800 was available all time via a water bottle dispenser. Pellets were delivered to the food magazine by an  
801 automated dispenser situated outside the experimental chamber. Mice were placed into the operant cham-  
802 bers in the evening around 5pm and taken out the following morning around 9-10am. Lights within the sound  
803 attenuating boxes in which the operant chambers were located ensured mice experienced a light/dark cycle the  
804 same as that of holding rooms. Training and testing started automatically from the beginning to the end of the  
805 dark phase (8pm to 8am). Initially, a fixed ratio (FR)-1 reinforcement schedule was applied, i.e. one  
806 nose poke in the active hole resulted in delivery of one pellet. Mice were exposed to the FR1 schedule  
807 until they reached the criterion of > 80% active pokes during the entire night for two consecutive nights.

808 Mice that met this learning criterion were switched to a FR3 reinforcement schedule, i.e. three nose-  
809 pokes in the active hole produced delivery of one pellet. The FR3 reinforcement schedule lasted two  
810 nights if mice met the criterion of > 80% active pokes during the entire night. Afterward, mice were  
811 exposed to a progressive ratio (PR) schedule that lasted two hours from the beginning of the night  
812 phase and was changed nightly; first night: PR3; second night: PR6; and third night: PR9. Mice were  
813 returned to their home cage after the PR test. During the PR experiment, the number of active nose-  
814 pokes required to obtain each successive food pellet was progressively increased by three (PR3,  
815  $3n+3$ ), six (PR6,  $6n+6$ ) and 9 (PR9,  $9n+9$ ; where  $n$ =number of pellets earned). For example, in PR3  
816 earning the first reinforcer required three active nose pokes, the second six nose pokes, the third nine  
817 nose pokes, etc. Likewise, in PR9 earning the first reinforcer required 9 active nose-pokes, the second  
818 eighteen nose-pokes, the third twenty-seven nose-pokes, etc. Following each PR session, we calcu-  
819 lated the breakpoint (BP) as the last ratio level completed before the end of the two-hour testing  
820 session. For example, under the PR3 or the PR9 reinforcement schedules, to earn the third food pellet  
821 a mouse had to poke  $3+6+9$  or  $9+18+27$  times in the active hole, and thus was given a BP value of 9  
822 or 27, respectively. The BP is a well-validated measure reflecting the strength of the reinforcer and  
823 the motivational state of the animal.

824

## 825 **Immunohistochemistry**

826 Mice were deeply anesthetized (urethane 20%) and perfused transcardially with PBS followed by 4%  
827 formaldehyde solution (Sigma-Aldrich) in PBS, pH 7.4. Brains were extracted, post fixed overnight  
828 in 4% formaldehyde and cryoprotected in 30% sucrose in PBS. 40- $\mu$ m-thick coronal sections con-  
829 taining region of interest were cut on a freezing microtome (VT1000S, Leica Camera AG, Wetzlar,  
830 Germany) and collected in PBS before being processed for immunohistochemistry. For GFAP im-  
831 munostaining, free-floating slices were first washed once in 0.3% Triton X-100 PBS (PBS-T) for 10  
832 minutes, and twice with 0.1% PBS-T, then incubated for 1 h in a blocking solution of 5% normal goat  
833 serum (NGS) in 0.1 % PBS-T. Subsequently they were incubated overnight at 4 °C with 1:300 rabbit



834 polyclonal anti-GFAP antibody (Novus Biologicals, Centennial, CO, USA) in blocking solution. For  
835 TH immunostaining, slices were blocked in PBS with 2% bovine serum albumin (BSA) and 0.2%  
836 Tween-20 (Sigma-Aldrich) for 1 hour at room temperature, and then incubated with 1:1000 rabbit  
837 anti-TH primary antibody (AB152, Millipore, Burlington, MA, USA) in blocking solution for 72  
838 hours at 4°C. Slices were then incubated with Goat anti-rabbit Alexa 488 secondary antibody, 1:1000  
839 for GFAP stained slices, and 1:500 for TH stained slices (A-11035, Invitrogen by Thermo Fisher  
840 Scientific, Waltham, Massachusetts, USA ) for 1 hour at room temperature. Between steps four  
841 washes in blocking solution were applied for 10 minutes. Slices were then mounted with ProLong™  
842 Gold Antifade Mountant (ThermoFisher Scientific) and imaged in an inverted laser scanning confocal  
843 microscope (A1 Nikon, Shinjuku, Japan) using a 20x or 40x objective. Quantification and analysis  
844 were performed using Fiji software (Wayne Rasband, NIH, USA), outlining regions of interest. To  
845 analyze the number of Glast-positive cells in GPe sections, 20x magnification confocal images were  
846 acquired. For each animal three images were taken from sliced collected between 0.58 and -0.70 mm  
847 from Bregma. Glast-positive cells were quantified by averaging the cell density within and across  
848 each animal from 10µm maximum projections images. Counts were performed using 3D objects  
849 counters tool provided by NIH Imagej software and the subsequent analyses were performed follow-  
850 ing a blind procedure. Astrocyte surface and relative intensity were calculated analyzing GFAP signal  
851 in GFAP- and Glast-positive cells from 10µm maximum projection images, acquired at 40x magni-  
852 fication.

853

#### 854 **Electron microscopy**

855 Mouse brains were perfused in 4% formaldehyde and 2% glutaraldehyde and embedded as described  
856 previously (Polishchuk & Mironov 2001). Bright field transmission electron microscopy images were  
857 acquired from thin (70 nm) sections using a Gatan Orius SC1000 series CCD camera (4008 x 2672  
858 active pixels) (Gatan, Pleasanton, USA), fiber optically coupled to high-resolution phosphor scintil-  
859 lator under a JEOL JEM-1011 transmission electron microscope (TEM) (JEOL, Tokyo, JAPAN) with

860 thermionic source (W filament) and maximum acceleration voltage 100 kV. All transverse sections  
861 of the Golgi Complex (GC) were taken at the same magnification (X6000) and analyzed using point-  
862 counting procedures, with surface densities of Golgi Complex ( $S_{ViGC}$ ) and Cytoplasm ( $S_{ViCYT}$ ) de-  
863 termined according to Leitz ASM system. Moreover, a qualitative score from 1 to 3 was assigned to  
864 all GC: the maximum score (3) was given when finding a group of cisternae organized in stacks  
865 containing tubular and vesicular structures, as defined for GC, and the lower score (1) was given  
866 when GC structure was destroyed. Double tilt high angular annular dark field (HAADF) scanning  
867 TEM (STEM) tomography was performed using a Tecnai F20 transmission electron microscope (FEI  
868 Company, Eindhoven, The Netherlands), equipped with a field-emission gun operating at 200 kV and  
869 a Gatan Ultrascan US1000 (Gatan, Pleasanton, USA) . For the reconstruction of the Golgi apparatus  
870 in *Dys1<sup>+/-</sup>* mouse astrocytes a 300-nm-thick section was tilted over  $\pm 60^\circ$  with the following tilt  
871 scheme:  $1^\circ$  at tilt higher than  $\pm 30^\circ$  and  $2^\circ$  intervals at intermediate tilts. The images were acquired  
872 using a HAADF detector at a magnification of 40,000 times. Computation of double tilt tomogram  
873 was done by combining two tilt series taken around two orthogonal axes with the IMOD software  
874 package. 3D reconstruction has been performed using Amira<sup>TM</sup> Software (Thermo Fisher Scientific).

875

## 876 **Cell cultures**

877 Astrocytes-enriched cell cultures were obtained from cortices dissected from PND1 mice. Pups were  
878 sacrificed by cervical dislocation and cortices were quickly dissected in ice-cold HBSS (Hanks' Bal-  
879 anced Salt Solution, Gibco ThermoFisher Scientific). Samples were incubated in HBSS with 0,125%  
880 Trypsin-EDTA (ThermoFisher Scientific) and 1 mg/mL DNAase I (Sigma-Aldrich) for 20 minutes  
881 at  $37^\circ\text{C}$ . A solution of DMEM (Dulbecco's Modified Eagle Medium, Gibco ThermoFisher Scientific)  
882 with 10% horse serum and 1% Penicillin-Streptomycin (Sigma-Aldrich) was added to the samples,  
883 which were then centrifuged 1200 rpm and washed twice in complete medium. Samples were disso-  
884 ciated mechanically in complete medium and filtered through 40  $\mu\text{m}$  cell strainers. Cell suspensions

885 were finally plated on poly-D-lysine coated plates. Cells were cultured until 100% confluence. Neu-  
886 ronal cell cultures were obtained from E18 mice embryos. Cortices were dissected in ice-cold HBSS  
887 and incubated in HBSS with 0,125% Trypsin-EDTA and 0,25 mg/mL DNAase I for 30 minutes at 37  
888 °C. A solution of Neurobasal™ medium (Gibco ThermoFisher Scientific) with 10% inactivated fetal  
889 bovine serum (Sigma-Aldrich), 1% Penicillin-Streptomycin, 1% GlutaMAX™ Supplement and 2%  
890 B27™ Supplement (Gibco ThermoFisher Scientific) was added to the samples, which were then cen-  
891 trifuged 1200 rpm and resuspended in complete medium before mechanical dissociation. Samples  
892 were filtered with 40 µm cell strainers, centrifuged 700 rpm and resuspended in complete medium.  
893 Cell suspensions were finally plated on poly-D-lysine coated plates. Neurons were cultured until  
894 complete maturation.

895

#### 896 **Western Blot**

897 For western blot analysis of Dys1 isoforms, we used Dys1<sup>+/+</sup> mice at embryonic stage E14.5, post-  
898 natal day 7, 35 and 90, Dys1 and Dys1A knockout mice, glial and neuronal cell cultures. Animals  
899 were sacrificed by cervical dislocation; brains were rapidly dissected and stored at -80°. Tissues or  
900 cultured cells were lysed in RIPA buffer and Protease Inhibitor Cocktail (Sigma-Aldrich). Western  
901 blot analysis was performed using mouse polyclonal anti-Dysbindin antibody (PA311 validated and  
902 produced by <sup>15</sup> and the anti-actin antibody (Sigma Aldrich). Amounts of 25µg of protein from pre-  
903 cipitated homogenates were separated on SDS-PAGE, electro- transferred onto nitrocellulose mem-  
904 branes, and then probed with primary antibodies: mouse monoclonal anti-Dysbindin antibody  
905 (1:1000) and mouse anti-Actin antibody (1:10000). Immune complexes were detected using appro-  
906 priate peroxidase-conjugated secondary antibodies (Thermo Fisher Scientific) and a chemilumines-  
907 cent reagent (ECL prime; GE Healthcare Europe GmbH, Milan, Italy). Densitometric analysis was  
908 performed using ImageQuantTL software (GE Healthcare Europe GmbH). Results were normalized  
909 to respective control conditions.

910

## 911 **Slices surface biotinylation**

912 These experiments were performed as previously described<sup>20,26</sup>. Mice were anesthetized with isoflu-  
913 rane and decapitated. The brain was sectioned in cold carb-oxygenated HBSS enriched with 4mM  
914 MgCl, 0,7 mM CaCl<sub>2</sub> and 10 mM D-glucose, equilibrated with 95% O<sub>2</sub> and 5% CO<sub>2</sub> to yield a pH  
915 7.4) on a vibrating microtome at a thickness of 300 μm. Striatum and prefrontal cortex were dissected  
916 from coronal slices. Before starting the surface biotinylation reaction, and to ensure a gradual cooling  
917 of the cells, the tissues were washed twice for 5 min in ice-cold HBSS buffer. The filters holding the  
918 tissues were transferred to a well containing an excess of biotinylation reagent solution of 100 μM  
919 NHS-LC-biotin (Pierce, Appleton, WI, USA) in HBSS. After 45 min of incubation, the tissues were  
920 transferred to another well and washed twice with the HBSS buffer containing 200 mM Lysine  
921 (Sigma-Aldrich), to block all reactive NHS-LC-biotin in excess. The tissues were washed twice with  
922 ice-cold HBSS and immediately placed on ice to mechanically disrupt the tissue in 120 μl of lysis  
923 buffer (1% TX-100, PBS1X and a cocktail of protease inhibitors (Sigma-Aldrich). To discard extra  
924 debris, homogenates were centrifuged for 5 min at 4°C at 13.000 r.p.m. and supernatants were col-  
925 lected. To precipitate the biotinylated proteins from the homogenates 50 μl of immobilized Streptav-  
926 idin beads (Pierce) were added to the samples and the mixture was rotating for three hours at 4°C.  
927 The precipitates were collected by brief centrifugation, mixed with 50 μl of SDS-PAGE loading  
928 buffer, boiled for 5 minutes and stored at -80°C until use. Protein extracts were separated on precast  
929 10% SDS/PAGE (Biorad, Milan, Italy) and transferred to nitrocellulose membranes. Blots were in-  
930 cubated with primary antibodies overnight at 4°C. Antibody used were dopamine D2 receptor (sc-  
931 5303, Santa Cruz Biotechnology, Dallas, TX, USA) and (AB5084P, Millipore), Synaptophysin (sc-  
932 365488, Santa Cruz Biotechnology) and Transferrin Receptor (sc-21011, Santa Cruz Biotechnology).  
933 Immune complexes were detected using appropriate peroxidase-conjugated secondary antibodies  
934 (Thermo Fisher Scientific) and a chemiluminescent reagent (ECL prime; GE Healthcare Europe  
935 GmbH, Milan, Italy). Densitometric analysis was performed by ImageQuantTL software (GE  
936 Healthcare Europe GmbH). Results were normalized to respective control conditions.

937

## 938 **Stereotaxic injections**

939 All surgeries were performed under aseptic conditions. Mice were deeply anesthetized with a mix of  
940 isoflurane/oxygen (2%/1%) by inhalation and mounted into a stereotaxic frame (David Kopf Instru-  
941 ments, Tujunga, CA, USA). Following shaving and preparation of the skin, a cranial hole was made  
942 above the targeted area. All measurements were made relative to bregma, in accordance with the  
943 mouse brain atlas <sup>71</sup>. The viral injection was performed using a borosilicate pipette at a rate of  
944 50nl/min using a 10- $\mu$ L Hamilton syringe. After each injection, 10-15 minutes were allowed before  
945 slowly withdrawing the micropipette. Animal receiving dLight injection (AAV-CAG-dLight1.2,  
946 400nl) in the GPe (Coordinates in mm: virus: AP: -0.4, ML: 1.9 and DV: 3.7, optic fiber implant: AP:  
947 0.4 mm; ML:  $\pm$  1.9 mm; DV: -3.6 mm) were implanted with a custom-made optic fiber (200 $\mu$ m,  
948 0.50NA, Thorlabs, Newton, NJ, USA) during a second surgery.

949 For cre expression in astrocytes, AAV viral injections (AAV8-GFAP-Cre-GFP or AAV8-GFAP-  
950 GFP) targeted the SNc/VTA (100nl, AP: -3 mm; ML:  $\pm$  0.50 mm; DV: -4.7 mm) or the GPe (400nl,  
951 AP: -0.4, ML: 1.9 and DV: 3.7). For calcium imaging viral AAV injections  
952 (AAV5.GfaABC1DcytoGCaMP6f.SV40 or GfaABC1D.cyto-tdTomato.SV40, Addgene, Water-  
953 town, MA, USA) targeted the PFC (300nl, AP: +1.9 mm; ML:  $\pm$ 0.3 mm; DV: -2.4 mm), the GPe  
954 (2x400nl, AP: -0.4, ML: 1.9 and DV: 3.7) or the SNc/VTA (250nl, AP: -3.1 mm; ML:  $\pm$  0.75 mm;  
955 DV: -4.5 mm), together with the control virus AAV-GFAP-TdTomato (1:5 ratio from the GCamP  
956 volume).

957

958

## 959 **Chromatographic analyses of dopamine, DOPAC, HVA, NA, 5HT, and 5HIAA**

960 *Ex vivo tissue collection.* Brains were harvested following rapid decapitation and sliced in 1 mm  
961 sections in a chilled stainless-steel mouse brain matrix. Slices were frozen on glass slides mounted

962 on dry ice. Using a 2 mm biopsy punch, bilateral PFC, STR and GPe punches were collected accord-  
963 ingly to the mouse brain atlas <sup>71</sup>, and stored at -80°C until neurochemical analyses.

964 *In vivo microdialysis.* Microdialysis procedure was performed as previously described <sup>20, 26</sup>. A con-  
965 centric dialysis probe with a dialyzing portion of 1 mm was prepared and stereotaxically implanted  
966 in the right GPe (coordinates of the dialyzing portion tip, in mm, relative to the bregma point, accord-  
967 ing to the atlas of Paxinos and Watson, 2001: anteroposterior (AP)=-0.4, lateral (L)=+1.9, ventral  
968 (V)=-4.5) under isoflurane anesthesia. After surgery, mice were housed individually to recover for  
969 24 hours. On the day of microdialysis, probes were perfused at a constant flow rate (1 µl/min) by  
970 means of a microperfusion pump, with artificial cerebrospinal Fluid (aCSF, in mM: 147 NaCl, 4 KCl,  
971 2.2 CaCl<sub>2</sub>). After 30 min stabilization, samples were collected every 20 min and stored in dry ice until  
972 the end of the experiment. Three groups of three dialysates (one hour per group) were consecutively  
973 collected: “baseline” (aCSF perfusion), “quinpirole” (perfusion of 25 nM quinpirole), and “wash-  
974 out” (aCSF perfusion). At the end of the microdialysis experiment, brains were collected and sliced  
975 to check probe implantation (only data obtained from mice with probes correctly implanted in the  
976 GPe were included in the results).

977 *Quantification of monoamines and metabolites by HPLC.* PFC, STR, and GPe tissue samples were  
978 lysed by sonication in 0.1 M perchloric acid, and centrifuged (15,000 x g, 10 minutes, 4°C). The  
979 supernatant was filtered by centrifugation (20,000 x g, 5 min, 4°C) in ultra-free microcentrifuge tubes  
980 (Millipore, Burlington, Massachusetts, USA). Supernatants obtained from PFC, STR or GPe samples,  
981 and from dialysates obtained from GPe *in vivo* microdialysis were injected (11 µl) into a high-perfor-  
982 mance liquid chromatography apparatus (Alexys UHPLC/ECD Neurotransmitter Analyzer, Antec  
983 Scientific, Zoeterwoude, The Netherlands), equipped with an autosampler (AS 100 UHPLC, micro,  
984 6-PV, Antec Scientific). The mobile phase [containing (in mM) 100 phosphoric acid, 100 citric acid,  
985 0.1 EDTA.2H 2H<sub>2</sub>O, 3 octanesulfonic acid. NaCl plus 8% acetonitrile, adjusted to pH 3.0 with NaOH  
986 solution (50%)] was delivered at 0.050 ml/min flow rate with a LC 110S pump (Antec Scientific)  
987 through an Acquity UPLC HSS T3 column (1 x 100 mm, particle size 1.8 µm; Waters, Milford,

988 Massachusetts, USA). Detection of dopamine, DOPAC and HVA was confirmed and carried out with  
989 two system. An electrochemical detector (DECADE II, Antec Scientific) equipped with a Sencell  
990 with a 2 mm glassy carbon working electrode (Antec Scientific) set at +600 mV versus Ag/AgCl.  
991 Output signals were recorded with Clarity (Antec Scientific). The second HPLC was equipped with  
992 a reversed-phase column (C8 3.5  $\mu$ m, Waters, USA) and a coulometric detector (ESA Coulochem III;  
993 Agilent Software). The electrodes of the analytical cell were set at +350 mV (oxidation) and -200  
994 mV (reduction). The mobile phase contained 50 mM CH<sub>3</sub>COONa, 0.07 mM Na<sub>2</sub>EDTA, 0.5 mM n-  
995 octyl sulfate, and 12% (v/v) methanol, the pH of mobile phase was adjusted with CH<sub>3</sub>COOH to 4.21.  
996 The sensitivity of the assay for DA/DOPAC/HVA was 5 fmol/sample. For tissue sample analysis,  
997 data were normalized by tissue weight. Dialysate contents were converted into percentages of the  
998 average baseline level calculated from the three fractions of the first hour of collection (“baseline”  
999 period), and are expressed as averaged percentages of “baseline”, “quinpirole” and “wash-out” peri-  
1000 ods, obtained in each experimental group.

1001

## 1002 **Fluorescence-activated cell sorting and cytometry**

1003 *Sorting of tdTomato-positive/negative cells.* Dys1AGlast mice were sacrificed by decapitation 4  
1004 weeks post Tamoxifen administration. Brains were quickly removed from the skull, and sub-cortical  
1005 regions containing basal ganglia were immediately dissected and washed in ice-cold PBS with 5.5  
1006 mM D-Glucose and 0.32 mM Sodium Pyruvate. Samples were then processed with the Adult Brain  
1007 Dissociation Kit and MACS<sup>®</sup> SmartStrainers 70  $\mu$ m diameter cell strainers (Miltenyi Biotec, Bergisch  
1008 Gladbach, Germany) to be disaggregated, filtered, and removed from myelin, debris and red blood  
1009 cells, according to manufacturer’s instructions. Final single-cell suspensions were obtained in 200  $\mu$ L  
1010 PBS with 0.5% BSA and 25 mM HEPES (sort buffer); to remove remaining debris and aggregates,  
1011 each cell suspension was filtered through a CellTrics<sup>®</sup> 50  $\mu$ m mesh diameter cell strainer (Sysmex,  
1012 Norderstedt, Germany). Samples were analyzed with BD FACSAria<sup>™</sup>II cytometer and cell sorter, by  
1013 using FacsDIVA software (BD Biosciences, Franklin Lakes, New Jersey, USA). TdTomato-positive

1014 and -negative astrocytes were gated on singlets and separately collected into 20  $\mu$ L sort buffer. Non-  
1015 fluorescent cells were used as negative control for gating.

1016 *Cytometry for D2 expression quantification.* Cell suspensions were obtained as described in the pre-  
1017 vious paragraph. Cells were stained with 0.25  $\mu$ L of eBioscience™ eFluor™ 780 viability dye (Invi-  
1018 trogen by Thermo Fisher Scientific) for 30 minutes at 4°C in the dark and washed in 2 mL PBS with  
1019 0.5% BSA. Cells were then resuspended and incubated for 5 min in PBS with 2% BSA and stained  
1020 with 2  $\mu$ g Anti-D2 Dopamine Receptor-FITC Antibody solution (Alomone Labs, Jerusalem, Israel)  
1021 for 40 minutes, at 4°C in the dark. Finally, cells were washed in 2 mL PBS with 0.5% BSA and  
1022 resuspended in 250  $\mu$ L sort buffer. Samples were analyzed with BD FACSAria™II cytometer and cell  
1023 sorter, by using FACS DIVA software (BD Biosciences). FITC mean fluorescence intensity (MFI) was  
1024 measured on tdTomato-positive and negative cells, which were previously gated on 20000 living  
1025 cells.

1026

1027

### 1028 **Quantitative real-time PCR**

1029 Sorted astrocytes were pelleted by centrifugation at 1000 rpm for 5 minutes at 4° C, and total RNA  
1030 was extracted using the RNeasy MicroKit (QIAGEN, Hilden, Germany), according to manufacturer's  
1031 instructions. RNA quantification and quality assessment were conducted with Nanodrop ND1000  
1032 microspectrophotometer (Thermo Fisher Scientific). RNA was retrotranscribed in cDNA using the  
1033 High-capacity cDNA Reverse Transcription Kit (Applied Biosystems, Foster City, California, USA),  
1034 according to manufacturer's instructions. Relative gene expression was assessed by real-time qPCR  
1035 (7900 HT, Applied Biosystems), and 96-well plates were used for amplification reactions in 10  $\mu$ L  
1036 final volume per well, charged as follows: 5  $\mu$ L iTaq™ Universal SYBR® Green Supermix (Bio-  
1037 Rad, Hercules, California, USA), 1  $\mu$ L primers mix and 4  $\mu$ L template, containing 2-5 ng cDNA;  
1038 primers were used at 0.5  $\mu$ M concentration. The thermal profile used was the following: 30 sec at 95  
1039 °C for denaturation, 15 s at 95° C and 1 min at 60 °C (40 cycles) for amplification, and 15 s at 95 °C,



1040 15 s at 60 °C and 15 s at 95 °C for dissociation. All reactions were performed in triplicate and analyzed  
1041 by SDS 2.3 software (Bio-Rad) to calculate cycle threshold (Ct) values. Relative gene expression  
1042 levels were normalized with Gapdh as reference gene and compared between genotypes with the  
1043  $\Delta\Delta$ Ct method. The following primers were used: Glst forward 5'-CTCACGGTCACTGCTGTCAT-  
1044 3' reverse 5'-GCCATTCCTGTGACGAGACT-3'; Dys1A forward 5'-ATGGCAA-  
1045 GCCTGGCTCATTTAGA-3' reverse 5'-AGTCCTCCAGGTGCAGCAAAT-3'; NeuN forward 5'-  
1046 ATCGTAGAGGGACGGAAAATTGA-3' reverse 5'-GTTCCCAGGCTTCTTATTGGTC-3'; D1  
1047 forward 5'-GACATACGCCATTTTCATCCTCC-3' reverse 5'-ATGCGCCGGATTTGCTTCT-3';  
1048 D2 forward 5'-ACCTGTCCTGGTACGATGATG-3' reverse 5'-GCATGGCATAGTAGTTGTAG-  
1049 TGG-3'; D3 forward 5'-TGGGGCAGAAAACCTCACTG-3' reverse 5'-TACCAGACCGTT-  
1050 GCCAAAGAT-3'; Dat forward 5'-AAATGCTCCGTGGGACCAATG-3' reverse 5'-  
1051 GTCTCCCGCTCTTGAACCTC-3'; Vmat2 forward 5'-ATGCTGCTCACCGTCGTAG-3' reverse  
1052 5'-GGCAGTCTGGATTTCCGTAGT-3'; Maob forward 5'-ATGAGCAACAAAAGCGATGTGA-  
1053 3' reverse 5'-TCCTAATTGTGTAAGTCCTGCCT-3'; Oct3 forward 5'-CAGCCCGAC-  
1054 TACTATTGGTGT-3' reverse 5'-TGAGCTGGTATTAGTGGCTTCC-3'; Th forward 5'-  
1055 GTCTCAGAGCAGGATACCAAGC-3' reverse 5'-CTCTCCTCGAATACCACAGCC-3'; Gapdh  
1056 forward 5'-GTGATGGGTGTGAACCACGA-3' reverse 5'-CTGTGGTCATGAGCCCTTCC-3'.

1057

1058

### 1059 **Fiber photometry in behaving mice**

1060 *In vivo dopamine dynamics in freely moving mice.* Seven days after the initial viral injection of AAV-  
1061 dLight, a flat-cut multimode optic-fiber (200 $\mu$ m, 0.50NA, Thorlabs) was gently inserted 300-400 $\mu$ m  
1062 above the virus injection site in the GPe. The implant was maintained in position using 2-to-3 anchor  
1063 screws and affixed to the skull using dental cement, a second ferrule was implanted contralaterally as  
1064 a dummy cannula to reduce rotation and movement artifacts.

1065 *In vivo calcium imaging in freely moving mice.* Seven to 10 days following the injection of  
1066 AAV5.GfaABC1DcytoGCaMP6f.SV40 and AAV-GFAP-TdTomato, mice underwent a second sur-  
1067 gery for the implantation of two flat-cut multimode optic-fiber (200 $\mu$ m, 0.50NA, Thorlabs) 300-  
1068 400 $\mu$ m above the virus injection site of the GPe or the VTA. The implant was maintained in position  
1069 using 2-to-3 anchor screws and affixed to the skull using dental cement.

1070 *Fiber photometry recordings.* Seven days after the surgery, mice were trained in the progressive ratio  
1071 test as described above. The day following two consecutive overnight FR3 sessions with more than  
1072 80% of correct choices, mice were transferred to a 1-hour day session at FR3 schedule, until comple-  
1073 tion of 2 consecutive days at more than 80% correct choices. At that stage, all mice were connected  
1074 to the patch-cord, with no recording to habituate the mice. Next, mice were tested at the same condi-  
1075 tions in consecutive daily sessions for FR3, PR3, PR6 and PR9 schedules, and this time calcium  
1076 signal was acquired. The fiber photometry signal was acquired for 10 minutes before the beginning  
1077 of the sessions to minimize photobleaching effects. tdTomato fluorescence in astrocytes was used as  
1078 control signal. Two LED beams (465 and 560nm, Doric Lenses, Quebec, Canada) were focused onto  
1079 an integrated fluorescence mini cube (for dLight #Ifmc5, Doric lenses) or two fluorescence mini cube  
1080 (for GCamP, #Ifmc5, Doric lenses ) using a 50:50 beam divider (Thorlabs) where both excitation  
1081 wavelengths were filtered at 460-490 and 555-570nm respectively. Excitation wavelength were ad-  
1082 justed to reach approximately 30 $\mu$ W to each ferrule with variation between animals based on the  
1083 signal-to-noise-ratio (SNR). To measure F<sub>0</sub>, both beams were pulsed at anti-synchronous frequency  
1084 (330Hz for 560nm, and 210Hz for 465nm). The beams were redirected into a low-autofluorescence  
1085 400 $\mu$ m patch-cord and connected to the head-implant using a ceramic sleeve. For dLight experiments,  
1086 a dummy patch-cord was connected to the dummy cannula, limiting rotation and movement artifacts.  
1087 The resulting emission signals were merged and filtered at 500-540nm (GCAMP) and 580-680nm  
1088 (tdTomato). For single site photometry (dLight) both signals were directed onto their own femtowatt  
1089 photosensor (Newport, Irvine, CA, USA) and deconvolved directly using their respective excitation  
1090 wavelength. For dual site photometry (GCamP) the resulting signal of each ferrule were directed onto

1091 a single femtowatt photosensor and analyses using lock-in deconvolution. Low-DC signal of the pho-  
1092 toensors were then processed using RZP5 hardware and Signal software (Synapses, Tucker Davis  
1093 Technology, Alachua, FL, USA). The acquisition rate was down sampled at 1017Hz (6<sup>th</sup> order) and  
1094 both signals (dLight/tdTomato or GCAMP/tdTomato) were first deconvolved using the excitation  
1095 wavelength with the time period of laser OFF ( $F_0$ ) and laser ON ( $\Delta F$ ). Behavior events output from  
1096 the operant boxes (Med Associates) were duplicated, converted to TTL signal (5V) using a custom-  
1097 made 28-to-5V converter and sent to the inputs port of the acquisition box. Behavioral and florescent  
1098 signal extracted from the Synapse software were then converted to Matlab using TDTtoolbox.

1099 *Analyses of the photometry signal.* All analyses were done on Matlab (2020a, Mathworks). For each  
1100 animal, recordings were done during 1 hour daily sessions. Signal for the FR3 and PRs schedules  
1101 were analyzed separately before to be merged, as presenting similar response patterns. We extracted  
1102 the timestamps of each event using the TTL onset: entry in a correct poke, entry in the food magazine,  
1103 and entry in the incorrect hole. Signal processing was done for each behavioral event aligning the  
1104 GCamp/dLight and the tdTomato signal with a 120sec window centered at the behavioral event  
1105 (1mins baseline, 1min post-event), and then grouped by trial type, genotype and condition. Each sig-  
1106 nal trials were then analyzed as follow: all signals were detrend using a linear detrend function and  
1107 z-score using the pre-event windows as mean and standard-deviation value. All data point (F) were  
1108 normalized to the 60s windows ( $F_0$ ) to express calcium variation ( $\Delta F/F_0$ ) where  $\Delta F$  is the change of  
1109 calcium between F and  $F_0$ . Using such an approach allow us to conserve the SNR and the subthreshold  
1110 calcium oscillation while not being affected by inter-animal variation nor the low SNR of the astro-  
1111 cytic calcium signal. Following completion of the analyses, signal was down sampled to a 2Hz fre-  
1112 quency. For statistical analyses, a non-overlapping moving window of 500ms were used to extract  
1113 the individual trials signal prior and after each event. For each behavioral event, a repeated measure  
1114 ANOVA was used to analyze variation of GCamp, dLight and tdTomato signals from the baseline  
1115 and between genotypes. In order to avoid the extraction of non-specific signal, random trials for each  
1116 animal were extracted using a 200 random iteration (timestamps) per animals and pooled as random

1117 lag for each event. All experiments were conducted blindly, and repeated in at least two different  
1118 cohort of mice, analyzing at the same way the tdTomato, GCaMP and dLight signals. We did not  
1119 normalize GCaMP/dLight signal to their tdTomato control signal due to the risk to increase non-  
1120 specific signal (Joon Lee et al., 2019).

1121 *Signal correlation from photometry.* For all behaviors, the correlation between GPe-signal and  
1122 dLight-signal before and after magazine entries or correct pokes was counted based on the Pearson's  
1123 correlation coefficient (PCC). The overall activities of GCaMP-GPe and dLight-GPe signal from 5  
1124 sec before to 5 sec after magazine entries or correct pokes were used to count overall PCC and their  
1125 relative p-value. To understand the synchrony of the two signals after the magazine entries or correct  
1126 pokes, the cross-correlation between GCaMP-GPe and dLight-GPe was computed using a Matlab  
1127 function (xcorr). This function calculates PCC between two signals when one of them is time shifted  
1128 (lag) in respect to the other. It is possible to understand the time in which the traces are most correlated  
1129 (lag) to each other by observing the PCC's change linked to the time shift. If the highest PCC's  
1130 (absolute value) is displayed with no time shift (in lag 0), both signals are synchronized (within a  
1131 window related to calcium oscillation decay and rising time).

1132

### 1133 **Drosophila**

1134 *Stocks and crosses.* The UAS-Ddysb-RNAi *Drosophila* line (v34355) used in this study was obtained  
1135 from VDRC (Vienna Drosophila Stock Center). The Gal4 activator lines tubulin-Gal4 (5138), repo-  
1136 Gal4 (7415), and elav-Gal4 (458), and the transgenic lines UAS-GalT-GFP (30902), were obtained  
1137 from the Bloomington Stock Center, Indiana University. Experimental crosses were performed at  
1138 28°C.

1139 *Immunocytochemistry.* *Drosophila* immunostaining was performed on wandering third instar larvae  
1140 reared at 28°C. Third-instar larvae were dissected in PBS and fixed in 4% paraformaldehyde (PFA)  
1141 in PBS for 15 minutes, washed in PBS 0,1% Triton X-100 (PBTX), and incubated with primary an-  
1142 tibody overnight, and secondary antibody for 1 hour. The primary antibody anti-Repo-8D12 (1:200,

1143 DSHB) was used. Secondary antibody Cy5conjugated Goat anti-Mouse IgG (115-175-003) was from  
1144 Jackson Immuno Research, and was used at 1:500. Third instar larvae were then mounted with  
1145 Mowiol 488 and were imaged using a Nikon EZ-C1 confocal microscope equipped with a Nikon Plan  
1146 APO 60.0×/1.40 oil immersion objective. Z-stacks with a step size of 1  $\mu\text{m}$  were taken using identical  
1147 settings. Each stack consisted of 15 to 20 plane images of 10 animals per genotype. The images  
1148 obtained were processed and analyzed using *ImageJ*.

1149 **qRT-PCR.** *Drosophila* samples (8 mg each) were homogenized in TRIzol Reagent (ThermoFisher  
1150 Scientific) and total RNA was subsequently isolated with Direct-zol™ RNA MiniPrep (Zymo Re-  
1151 search, Irvine, CA, USA) following the manufacturer's instructions. Yield and purity were determined  
1152 by absorbance at 230, 260, and 280 nm using NanoDrop 2000c spectrophotometer (ThermoFisher  
1153 Scientific). Quantification of D2R gene expression was performed on Eco Real-Time PCR (Illumina,  
1154 San Diego, CA, USA) using One Step SYBR PrimeScript RT-PCR II kit (Takara Bio, Shiga, Japan).  
1155 The expression level of RP49 was used as a housekeeping (normalizing) gene. Relative gene expres-  
1156 sion was quantified with the  $\Delta\Delta\text{Ct}$  Comparative method. The primers used for expression of D2R  
1157 gene were: forward primer, 5'-CCTTCTACAACGCCGACTTTA-3', reverse primer 5'-  
1158 ACTCCTCAGCGCCTTGAA-3'. To avoid eventual contamination by genomic DNA primers were  
1159 designed to span an intron–exon boundary and/or RNA samples were treated with DNase.

1160

### 1161 **Human samples**

1162 The mRNA expression values are referred to DTNBP1 NM\_183040 gene expression in the human  
1163 postmortem dorsolateral prefrontal cortex (DLPFC) of normal subjects across lifespan. The data are  
1164 available in the open access on-line application “The Brain Cloud”, which allows the query of ge-  
1165 nome-wide gene expression data and their genetic control, <http://www.libd.org/braincloud>. We se-  
1166 lected the single isoforms values on the base of Illumina probes used for the quantification. The Illu-  
1167 mina probes used to identify the human dysbindin-1 isoforms were, for Dysbindin-1A hHA -

1168 chr6:15632467-15632536, and for Dysbibdin-1C the hHC -chr6:15735609-15735678, both referred  
1169 to Human assembly Mar 2006 (NCBI 36/hg18).

1170 Caudate samples from 18 healthy control samples and 22 schizophrenia cases were obtained from the  
1171 NSW Tissue Resource Center. The tissue was processed at Neuroscience Research Australia as ap-  
1172 proved by the University of New South Wales Human Research Ethics Committee (HREC 12435;  
1173 Sydney, Australia). There were no significant differences found in the demographic variables of age,  
1174 sex, pH, or PMI between the diagnostic groups (Supplementary Fig. S4). The rostral caudate was  
1175 dissected from anatomically matched fresh frozen coronal sections cut at 60  $\mu\text{m}$  through the head of  
1176 the caudate. Caudate extracted samples (run in duplicates) were denatured in loading buffer 2X, and  
1177 boiled for 5 min at 95°C, then the denatured samples were centrifuged at 10,000 g for 5 min. Each  
1178 lane was loaded with 20 mg of total protein, as in previous studies (Talbot et al. 2011; Tang et al.  
1179 2009).

1180

## 1181 **Statistics**

1182 For animal experiments, no statistical methods were used to predetermine sample sizes, although  
1183 sample sizes were consistent with those from previous studies<sup>20, 26, 70, 72</sup>. No explicit randomization  
1184 method was used to allocate animals to experimental groups and mice were tested and data processed  
1185 by investigators blind to animal identity. Statistical analyses were performed using commercial soft-  
1186 ware (STATISTICA- 13.5, StaSoft, Tulsa, OK, USA and Prism 7, GraphPad, San Diego, CA, USA).  
1187 Results are expressed as mean  $\pm$  standard error of the mean (SEM) throughout the manuscript. Mul-  
1188 tiple Student's *t*-test, one-way and two-way ANOVAs were used, as appropriate. The accepted value  
1189 for significance was  $P < 0.05$ . Newman-Keul's test for post hoc analysis was performed, when the  
1190 ANOVA highlighted a statistical significance between main effects. Data distribution was tested us-  
1191 ing the D'Agostino and Pearson normality test. Data were tested for normality before statistical anal-  
1192 ysis, by using Shapiro-Wilk, the D'Agostino and Pearson tests. The experiments reported in this work

1193 were repeated independently two to four times, using mice from at least four different generations.

1194 Numbers of mice are reported in the figure legends.

1195

1196 **References**

1197

- 1198 1. Liddelow, S.A., *et al.* Neurotoxic reactive astrocytes are induced by activated microglia.  
1199 *Nature* **541**, 481-487 (2017).
- 1200 2. Araque, A., *et al.* Gliotransmitters travel in time and space. *Neuron* **81**, 728-739 (2014).
- 1201 3. Petrelli, F., *et al.* Dysfunction of homeostatic control of dopamine by astrocytes in the  
1202 developing prefrontal cortex leads to cognitive impairments. *Mol Psychiatry* (2018).
- 1203 4. Nagai, J., *et al.* Hyperactivity with Disrupted Attention by Activation of an Astrocyte  
1204 Synaptogenic Cue. *Cell* **177**, 1280-1292 e1220 (2019).
- 1205 5. Corkrum, M., *et al.* Dopamine-Evoked Synaptic Regulation in the Nucleus Accumbens  
1206 Requires Astrocyte Activity. *Neuron* (2020).
- 1207 6. Adamsky, A., *et al.* Astrocytic Activation Generates De Novo Neuronal Potentiation and  
1208 Memory Enhancement. *Cell* **174**, 59-71 e14 (2018).
- 1209 7. Kol, A., *et al.* Astrocytes contribute to remote memory formation by modulating hippocampal-  
1210 cortical communication during learning. *Nature neuroscience* (2020).
- 1211 8. Mariotti, L., *et al.* Interneuron-specific signaling evokes distinctive somatostatin-mediated  
1212 responses in adult cortical astrocytes. *Nat Commun* **9**, 82 (2018).
- 1213 9. Shao, W., *et al.* Suppression of neuroinflammation by astrocytic dopamine D2 receptors via  
1214 alphaB-crystallin. *Nature* **494**, 90-94 (2013).
- 1215 10. Cui, Q., *et al.* Blunted mGluR Activation Disinhibits Striatopallidal Transmission in  
1216 Parkinsonian Mice. *Cell Rep* **17**, 2431-2444 (2016).
- 1217 11. Jennings, A., *et al.* Dopamine elevates and lowers astroglial Ca(2+) through distinct pathways  
1218 depending on local synaptic circuitry. *Glia* **65**, 447-459 (2017).
- 1219 12. Ben Haim, L. & Rowitch, D.H. Functional diversity of astrocytes in neural circuit regulation.  
1220 *Nat Rev Neurosci* **18**, 31-41 (2017).
- 1221 13. Chai, H., *et al.* Neural Circuit-Specialized Astrocytes: Transcriptomic, Proteomic,  
1222 Morphological, and Functional Evidence. *Neuron* **95**, 531-549 e539 (2017).
- 1223 14. Huang, A.Y., *et al.* Region-Specific Transcriptional Control of Astrocyte Function Oversees  
1224 Local Circuit Activities. *Neuron* **106**, 992-1008 e1009 (2020).
- 1225 15. Talbot, K., *et al.* Dysbindin-1 and Its Protein Family. in *Handbook of Neurochemistry and*  
1226 *Molecular Neurobiology* (ed. D.C. Javitt & J. Kantrowitz) 107-241 (Springer Science, New York,  
1227 2009).
- 1228 16. Talbot, K., *et al.* Synaptic dysbindin-1 reductions in schizophrenia occur in an isoform-  
1229 specific manner indicating their subsynaptic location. *PLoS One* **6**, e16886 (2011).
- 1230 17. Tang, J., *et al.* Dysbindin-1 in dorsolateral prefrontal cortex of schizophrenia cases is reduced  
1231 in an isoform-specific manner unrelated to dysbindin-1 mRNA expression. *Hum Mol Genet* **18**, 3851-  
1232 3863 (2009).
- 1233 18. Larimore, J., *et al.* Mutations in the BLOC-1 subunits dysbindin and muted generate divergent  
1234 and dosage-dependent phenotypes. *The Journal of biological chemistry* **289**, 14291-14300 (2014).
- 1235 19. Yuan, Y., Wang, H., Wei, Z. & Li, W. Impaired autophagy in hilar mossy cells of the dentate  
1236 gyrus and its implication in schizophrenia. *J Genet Genomics* **42**, 1-8 (2015).
- 1237 20. Scheggia, D., *et al.* Variations in Dysbindin-1 are associated with cognitive response to  
1238 antipsychotic drug treatment. *Nat Commun* **9**, 2265 (2018).
- 1239 21. Weickert, C.S., *et al.* Human dysbindin (DTNBP1) gene expression in normal brain and in  
1240 schizophrenic prefrontal cortex and midbrain. *Archives of general psychiatry* **61**, 544-555 (2004).
- 1241 22. Papaleo, F. & Weinberger, D.R. Dysbindin and Schizophrenia: it's dopamine and glutamate  
1242 all over again. *Biological psychiatry* **69**, 2-4 (2011).
- 1243 23. Waddington, J.L., Zhen, X. & O'Tuathaigh, C.M.P. Developmental Genes and Regulatory  
1244 Proteins, Domains of Cognitive Impairment in Schizophrenia Spectrum Psychosis and Implications



- 1245 for Antipsychotic Drug Discovery: The Example of Dysbindin-1 Isoforms and Beyond. *Front*  
1246 *Pharmacol* **10**, 1638 (2019).
- 1247 24. Wentzel, C., Delvendahl, I., Sydlik, S., Georgiev, O. & Muller, M. Dysbindin links  
1248 presynaptic proteasome function to homeostatic recruitment of low release probability vesicles. *Nat*  
1249 *Commun* **9**, 267 (2018).
- 1250 25. Shao, L., *et al.* Schizophrenia susceptibility gene dysbindin regulates glutamatergic and  
1251 dopaminergic functions via distinctive mechanisms in *Drosophila*. *Proceedings of the National*  
1252 *Academy of Sciences of the United States of America* **108**, 18831-18836 (2011).
- 1253 26. Leggio, G.M., *et al.* The epistatic interaction between the dopamine D3 receptor and  
1254 dysbindin-1 modulates higher-order cognitive functions in mice and humans. *Mol Psychiatry* (2019).
- 1255 27. Petit, E.I., *et al.* Dysregulation of Specialized Delay/Interference-Dependent Working  
1256 Memory Following Loss of Dysbindin-1A in Schizophrenia-Related Phenotypes.  
1257 *Neuropsychopharmacology* **42**, 1349-1360 (2017).
- 1258 28. Ferretti, V., *et al.* Oxytocin Signaling in the Central Amygdala Modulates Emotion  
1259 Discrimination in Mice. *Curr Biol* **29**, 1938-1953 e1936 (2019).
- 1260 29. Papaleo, F., *et al.* Dysbindin-1 modulates prefrontal cortical activity and schizophrenia-like  
1261 behaviors via dopamine/D2 pathways. *Mol Psychiatry* **17**, 85-98 (2012).
- 1262 30. Feng, Y.Q., *et al.* Dysbindin deficiency in sandy mice causes reduction of snapin and displays  
1263 behaviors related to schizophrenia. *Schizophrenia research* **106**, 218-228 (2008).
- 1264 31. Hattori, S., *et al.* Behavioral abnormalities and dopamine reductions in *sdyl* mutant mice with  
1265 a deletion in *Dtnbpl1*, a susceptibility gene for schizophrenia. *Biochem Biophys Res Commun* **373**,  
1266 298-302 (2008).
- 1267 32. Scheggia, D., Bebensee, A., Weinberger, D.R. & Papaleo, F. The ultimate intra-/extra-  
1268 dimensional attentional set-shifting task for mice. *Biological psychiatry* **75**, 660-670 (2014).
- 1269 33. Robbins, T.W. Shifting and stopping: fronto-striatal substrates, neurochemical modulation  
1270 and clinical implications. *Philosophical transactions of the Royal Society of London* **362**, 917-932  
1271 (2007).
- 1272 34. Clarke, H.F., Hill, G.J., Robbins, T.W. & Roberts, A.C. Dopamine, but not serotonin,  
1273 regulates reversal learning in the marmoset caudate nucleus. *J Neurosci* **31**, 4290-4297 (2011).
- 1274 35. Doherty, J.M., *et al.* Contributions of dopamine D1, D2, and D3 receptor subtypes to the  
1275 disruptive effects of cocaine on prepulse inhibition in mice. *Neuropsychopharmacology* **33**, 2648-  
1276 2656 (2008).
- 1277 36. Koch, M. The neurobiology of startle. *Prog Neurobiol* **59**, 107-128 (1999).
- 1278 37. Plappert, C.F., Pilz, P.K. & Schnitzler, H.U. Factors governing prepulse inhibition and  
1279 prepulse facilitation of the acoustic startle response in mice. *Behavioural brain research* **152**, 403-  
1280 412 (2004).
- 1281 38. Drew, M.R., *et al.* Transient overexpression of striatal D2 receptors impairs operant  
1282 motivation and interval timing. *J Neurosci* **27**, 7731-7739 (2007).
- 1283 39. Ward, R.D., Kellendonk, C., Kandel, E.R. & Balsam, P.D. Timing as a window on cognition  
1284 in schizophrenia. *Neuropharmacology* (2011).
- 1285 40. Ward, R.D., *et al.* Impaired timing precision produced by striatal D2 receptor overexpression  
1286 is mediated by cognitive and motivational deficits. *Behavioral neuroscience* **123**, 720-730 (2009).
- 1287 41. Papaleo, F., Kieffer, B.L., Tabarin, A. & Contarino, A. Decreased motivation to eat in mu-  
1288 opioid receptor-deficient mice. *The European journal of neuroscience* **25**, 3398-3405 (2007).
- 1289 42. Santello, M., Toni, N. & Volterra, A. Astrocyte function from information processing to  
1290 cognition and cognitive impairment. *Nature neuroscience* **22**, 154-166 (2019).
- 1291 43. Patriarchi, T., *et al.* Ultrafast neuronal imaging of dopamine dynamics with designed  
1292 genetically encoded sensors. *Science (New York, N.Y)* **360** (2018).
- 1293 44. Roberts, B.M., *et al.* GABA uptake transporters support dopamine release in dorsal striatum  
1294 with maladaptive downregulation in a parkinsonism model. *Nat Commun* **11**, 4958 (2020).

- 1295 45. Xin, W., *et al.* Ventral midbrain astrocytes display unique physiological features and  
1296 sensitivity to dopamine D2 receptor signaling. *Neuropsychopharmacology* **44**, 344-355 (2019).
- 1297 46. Meszaros, J., *et al.* Evoked transients of pH-sensitive fluorescent false neurotransmitter reveal  
1298 dopamine hot spots in the globus pallidus. *eLife* **7** (2018).
- 1299 47. Eid, L. & Parent, M. Chemical anatomy of pallidal afferents in primates. *Brain Struct Funct*  
1300 **221**, 4291-4317 (2016).
- 1301 48. Gomez, J.A., *et al.* Ventral tegmental area astrocytes orchestrate avoidance and approach  
1302 behavior. *Nat Commun* **10**, 1455 (2019).
- 1303 49. Papaleo, F., Burdick, M.C., Callicott, J.H. & Weinberger, D.R. Epistatic interaction between  
1304 COMT and DTNBP1 modulates prefrontal function in mice and in humans. *Mol Psychiatry* **19**, 311-  
1305 316 (2014).
- 1306 50. Weinstein, J.J., *et al.* Pathway-Specific Dopamine Abnormalities in Schizophrenia. *Biological*  
1307 *psychiatry* **81**, 31-42 (2017).
- 1308 51. Winterer, G. & Weinberger, D.R. Genes, dopamine and cortical signal-to-noise ratio in  
1309 schizophrenia. *Trends in neurosciences* **27**, 683-690 (2004).
- 1310 52. Simpson, E.H. & Kellendonk, C. Insights About Striatal Circuit Function and Schizophrenia  
1311 From a Mouse Model of Dopamine D2 Receptor Upregulation. *Biological psychiatry* **81**, 21-30  
1312 (2017).
- 1313 53. Takeuchi, Y., Yamamoto, H., Fukunaga, K., Miyakawa, T. & Miyamoto, E. Identification of  
1314 the isoforms of Ca(2+)/Calmodulin-dependent protein kinase II in rat astrocytes and their subcellular  
1315 localization. *J Neurochem* **74**, 2557-2567 (2000).
- 1316 54. Gittis, A.H., *et al.* New roles for the external globus pallidus in basal ganglia circuits and  
1317 behavior. *J Neurosci* **34**, 15178-15183 (2014).
- 1318 55. Carvalho Poyraz, F., *et al.* Decreasing Striatopallidal Pathway Function Enhances Motivation  
1319 by Energizing the Initiation of Goal-Directed Action. *J Neurosci* **36**, 5988-6001 (2016).
- 1320 56. Fiore, V.G., *et al.* Value encoding in the globus pallidus: fMRI reveals an interaction effect  
1321 between reward and dopamine drive. *Neuroimage* **173**, 249-257 (2018).
- 1322 57. Miller, J.M., *et al.* Anhedonia after a selective bilateral lesion of the globus pallidus. *The*  
1323 *American journal of psychiatry* **163**, 786-788 (2006).
- 1324 58. Sotoyama, H., *et al.* Pallidal hyperdopaminergic innervation underlying D2 receptor-  
1325 dependent behavioral deficits in the schizophrenia animal model established by EGF. *PLoS One* **6**,  
1326 e25831 (2011).
- 1327 59. Avila, G., Picazo, O., Chuc-Meza, E. & Garcia-Ramirez, M. Reduction of dopaminergic  
1328 transmission in the globus pallidus increases anxiety-like behavior without altering motor activity.  
1329 *Behavioural brain research* **386**, 112589 (2020).
- 1330 60. Hirase, H., Iwai, Y., Takata, N., Shinohara, Y. & Mishima, T. Volume transmission signalling  
1331 via astrocytes. *Philosophical transactions of the Royal Society of London* **369**, 20130604 (2014).
- 1332 61. Chazalon, M., *et al.* GAT-3 Dysfunction Generates Tonic Inhibition in External Globus  
1333 Pallidus Neurons in Parkinsonian Rodents. *Cell Rep* **23**, 1678-1690 (2018).
- 1334 62. Evans, R.C., *et al.* Functional Dissection of Basal Ganglia Inhibitory Inputs onto Substantia  
1335 Nigra Dopaminergic Neurons. *Cell Rep* **32**, 108156 (2020).
- 1336 63. Mohebi, A., *et al.* Dissociable dopamine dynamics for learning and motivation. *Nature* **570**,  
1337 65-70 (2019).
- 1338 64. Kramer, P.F., *et al.* Dopamine D2 receptor overexpression alters behavior and physiology in  
1339 *Drd2-EGFP* mice. *J Neurosci* **31**, 126-132 (2011).
- 1340 65. Giguere, N., *et al.* Increased vulnerability of nigral dopamine neurons after expansion of their  
1341 axonal arborization size through D2 dopamine receptor conditional knockout. *PLoS Genet* **15**,  
1342 e1008352 (2019).
- 1343 66. Anzalone, A., *et al.* Dual control of dopamine synthesis and release by presynaptic and  
1344 postsynaptic dopamine D2 receptors. *J Neurosci* **32**, 9023-9034 (2012).

- 1345 67. Bhardwaj, S.K., *et al.* Mice with dopaminergic neuron-specific deletion of DTNBP-1 gene  
1346 show blunted nucleus accumbens dopamine release and associated behaviors. *Neuropharmacology*  
1347 **184**, 108440 (2020).
- 1348 68. Bello, E.P., *et al.* Cocaine supersensitivity and enhanced motivation for reward in mice  
1349 lacking dopamine D2 autoreceptors. *Nature neuroscience* **14**, 1033-1038 (2011).
- 1350 69. Huang, H., *et al.* Chronic and acute intranasal oxytocin produce divergent social effects in  
1351 mice. *Neuropsychopharmacology* **39**, 1102-1114 (2014).
- 1352 70. Manago, F., *et al.* Genetic Disruption of Arc/Arg3.1 in Mice Causes Alterations in Dopamine  
1353 and Neurobehavioral Phenotypes Related to Schizophrenia. *Cell Rep* **16**, 2116-2128 (2016).
- 1354 71. Paxinos, G. & Franklin, K.B.J. *The mouse brain in stereotaxic coordinates* (Elsevier  
1355 Academic Press, Amsterdam, 2004).
- 1356 72. Scheggia, D., *et al.* Somatostatin interneurons in the prefrontal cortex control affective state  
1357 discrimination in mice. *Nature neuroscience* **23**, 47-60 (2020).
